# Supplementary material for: Presence of CD44v9-Expressing Cancer Stem Cells in Circulating Tumor Cells and Effects of Carcinoembryonic Antigen Levels on the Prognosis of Colorectal Cancer
Source: MDPI journal article supplement (doi:10.3390/cancers16081556), 2024-04-19
Supplement: s1 [file s1]

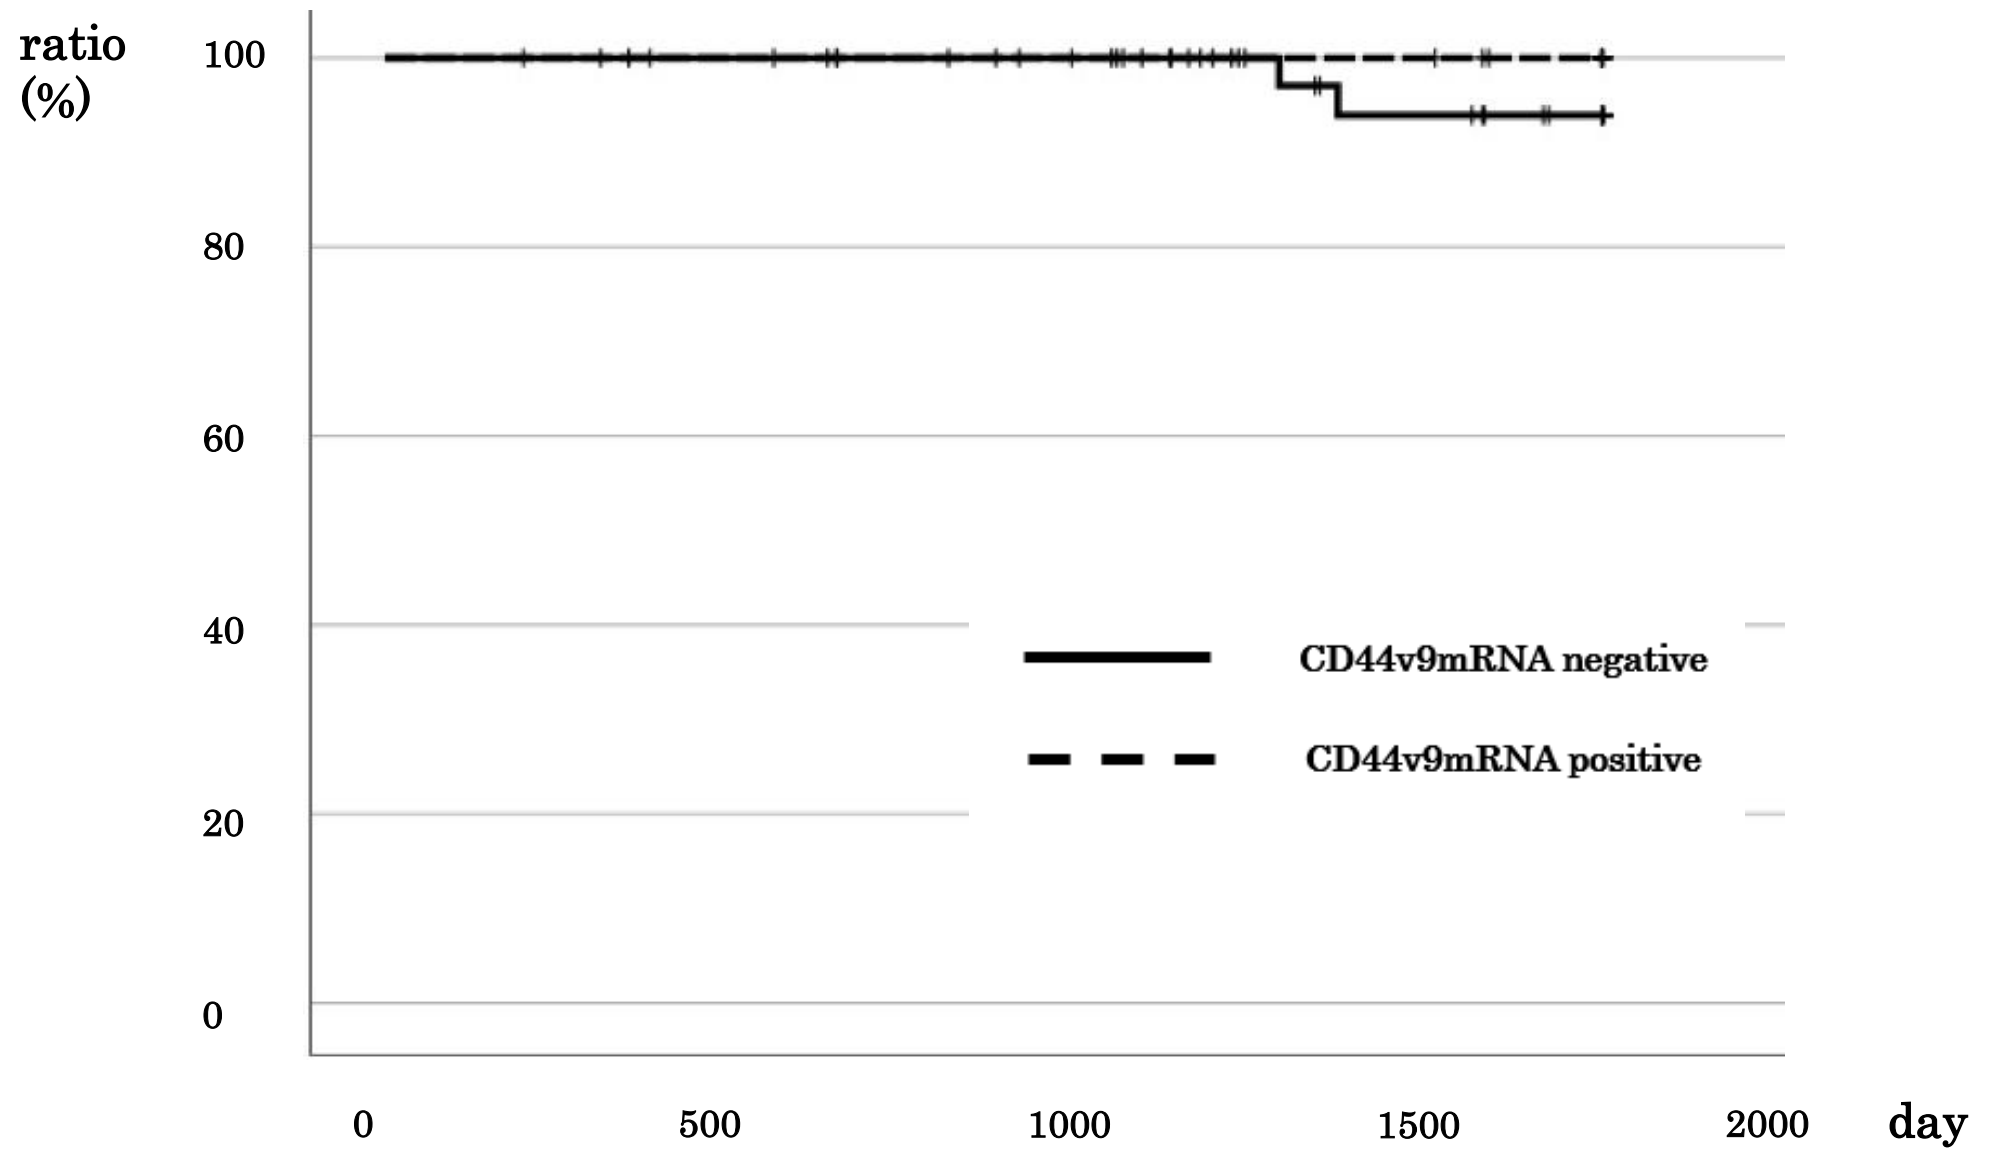

**Figure S1a.** Relationship between *CD44v9* mRNA expression and survival rate in patients with stage I of colorectal cancer.

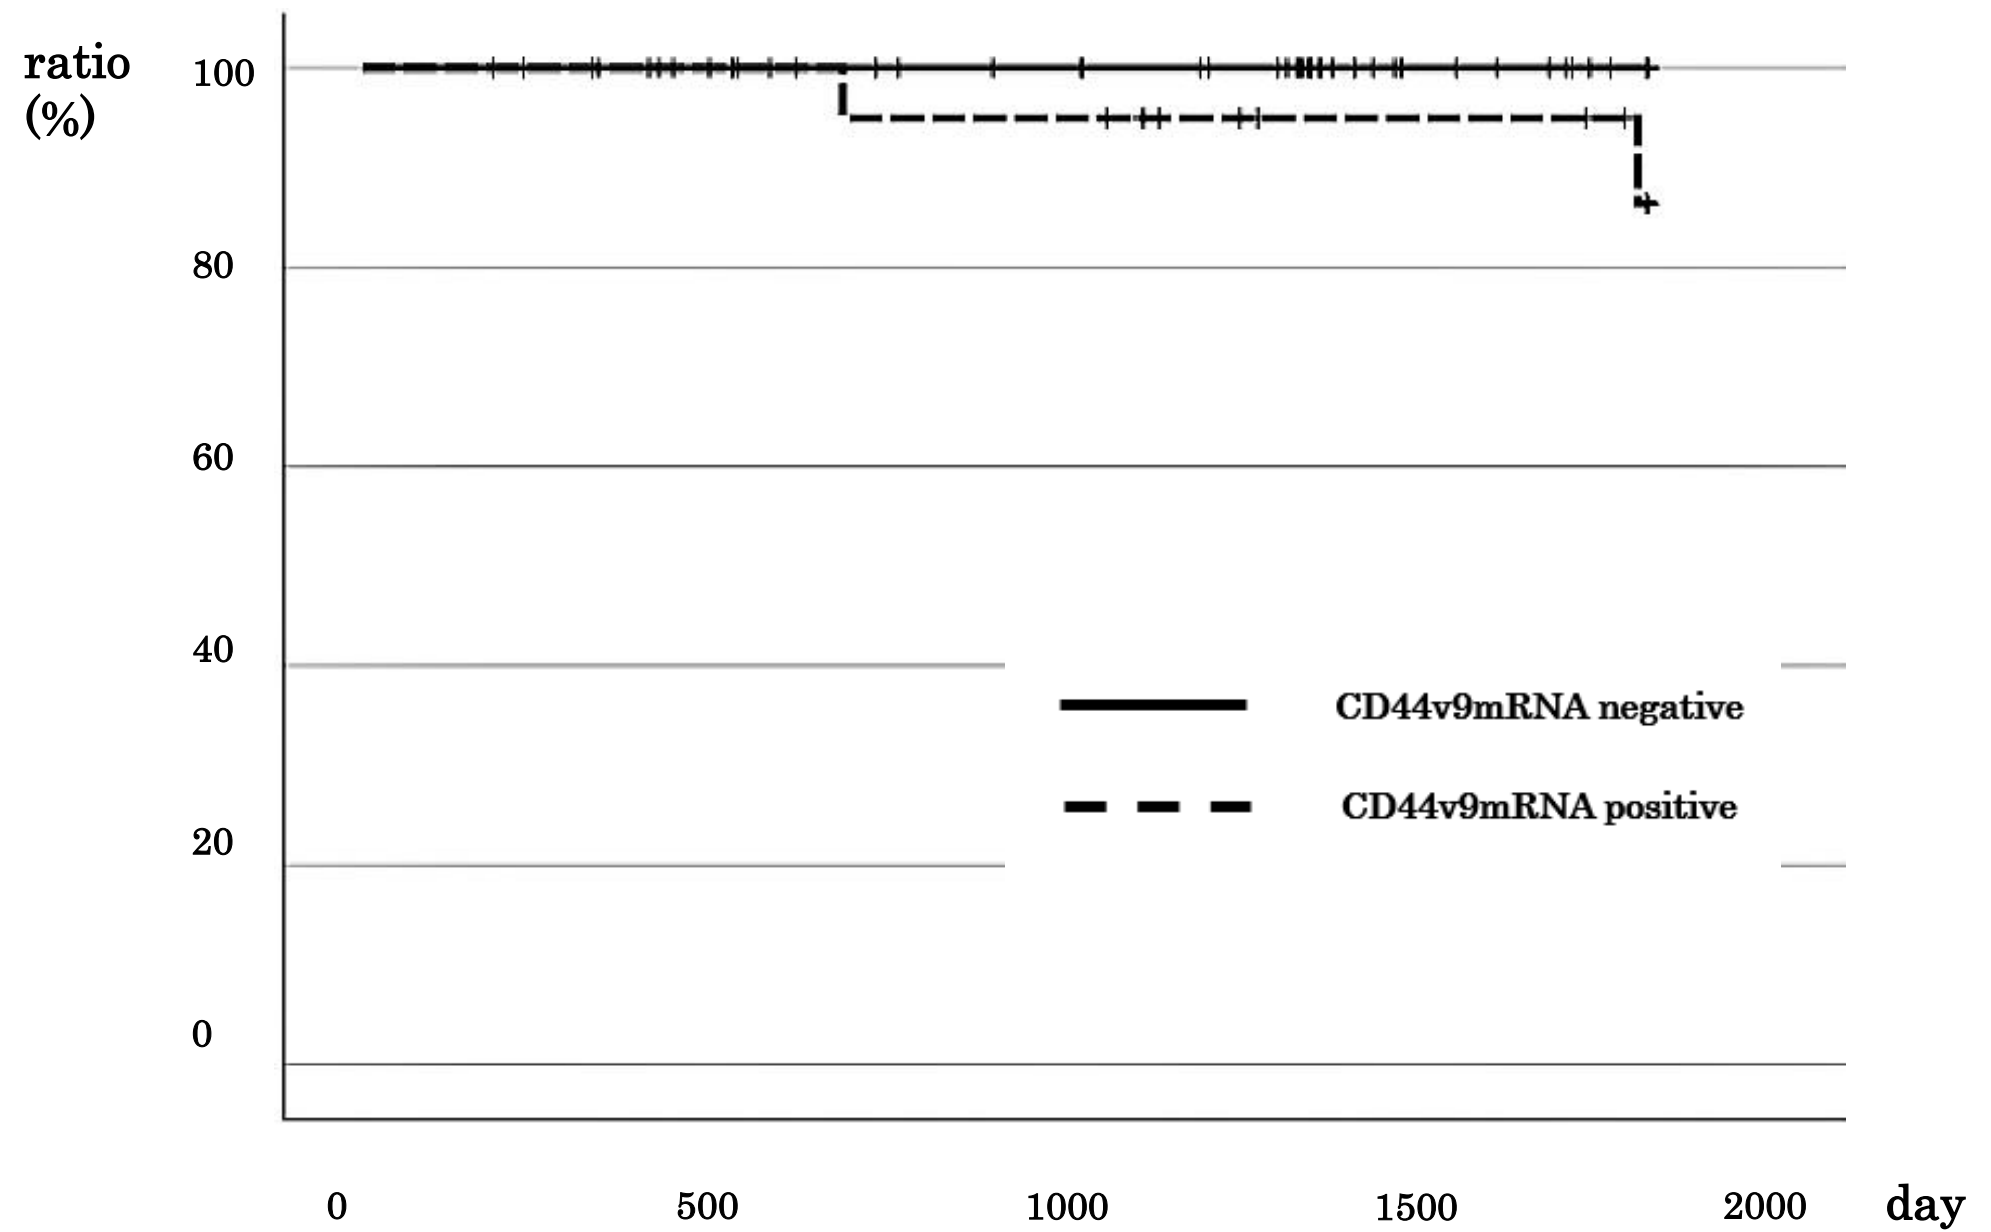

**Figure S1b.** Relationship between *CD44v9* mRNA expression and survival rate in patients with stage II of colorectal cancer.

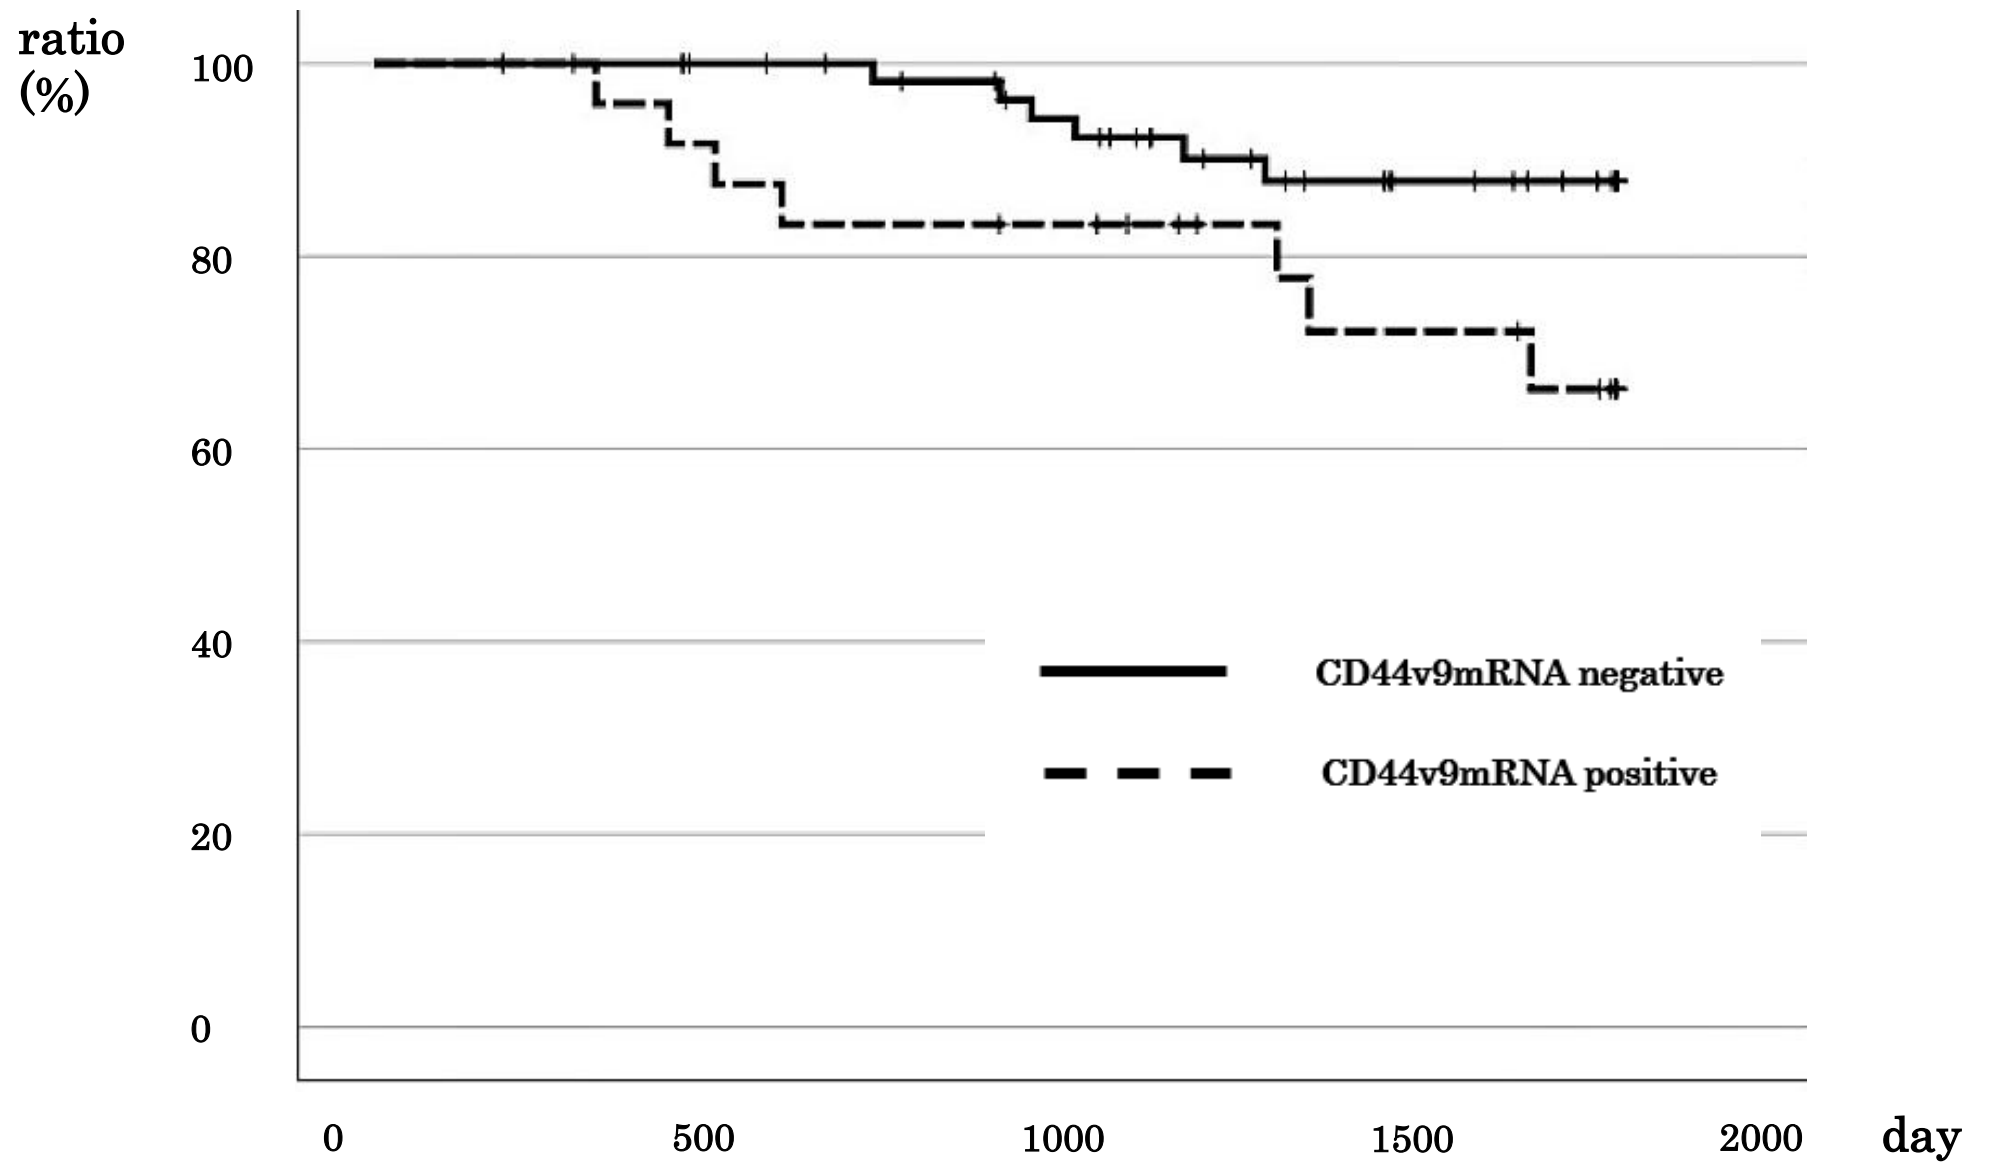

**Figure S1c.** Relationship between *CD44v9* mRNA expression and survival rate in patients with stage III of colorectal cancer.

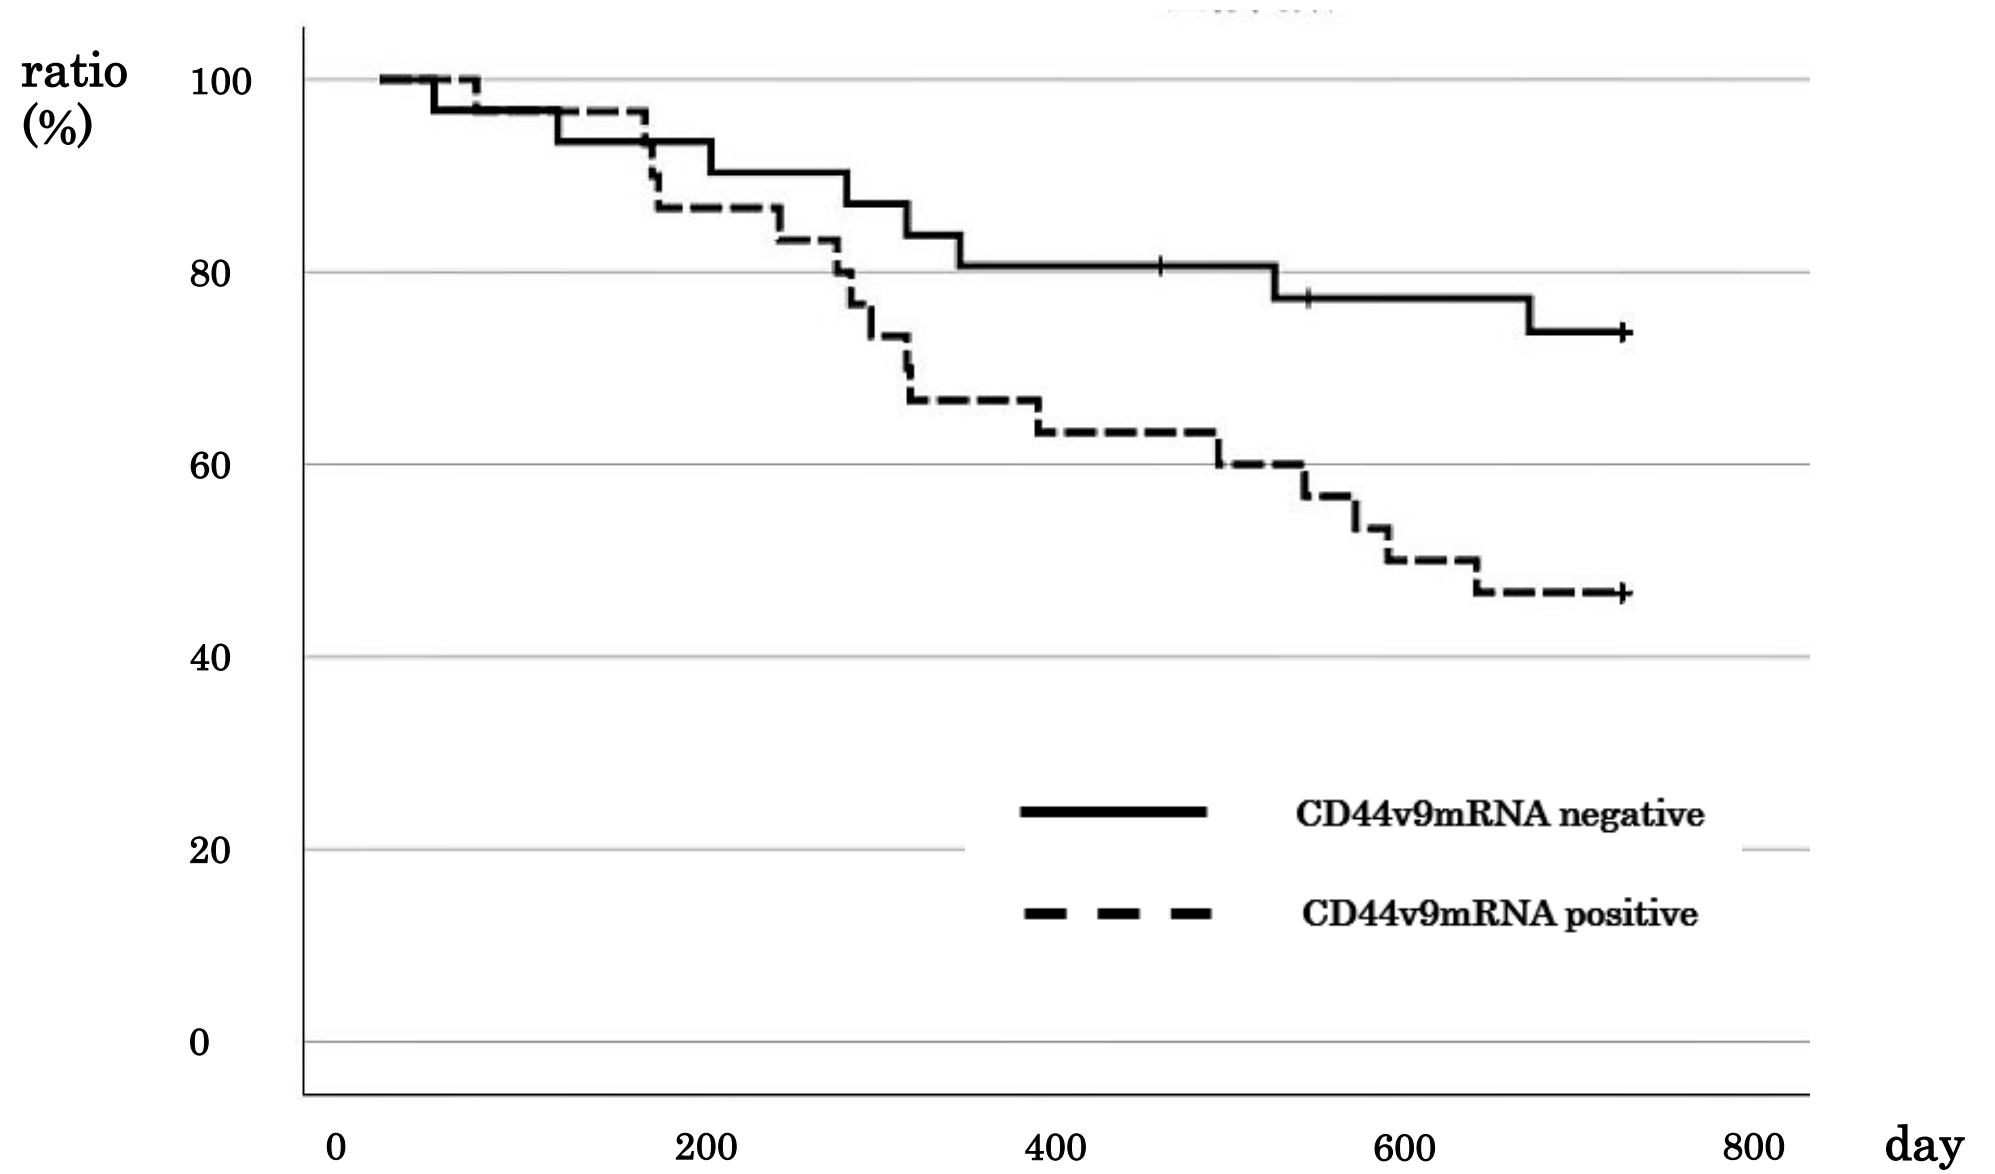

**Figure S1d.** Relationship between *CD44v9* mRNA expression and survival rate in patients with stage IV of colorectal cancer.

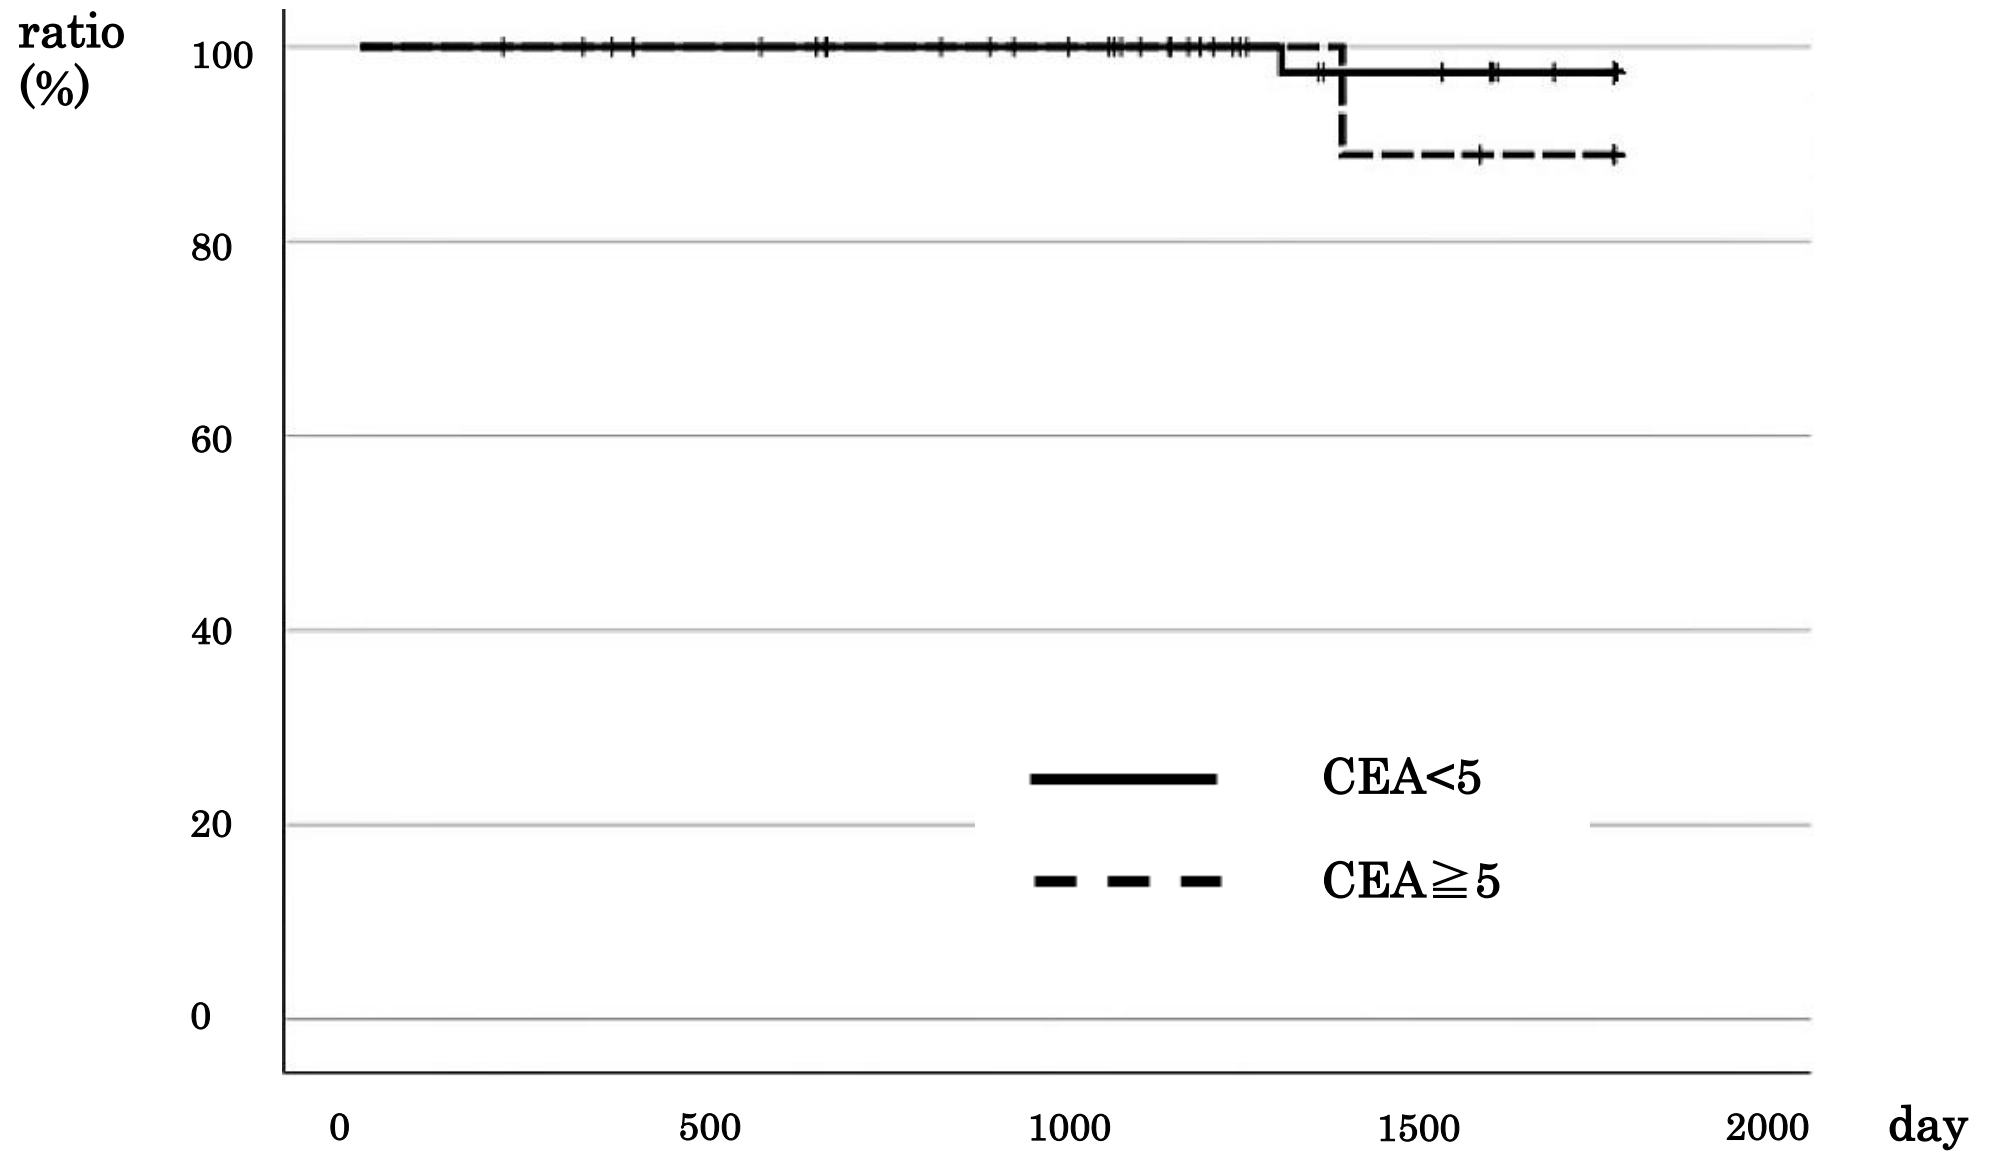

**Figure S2a.** Relationship between CEA values and survival rate in patients with stage I of colorectal cancer.

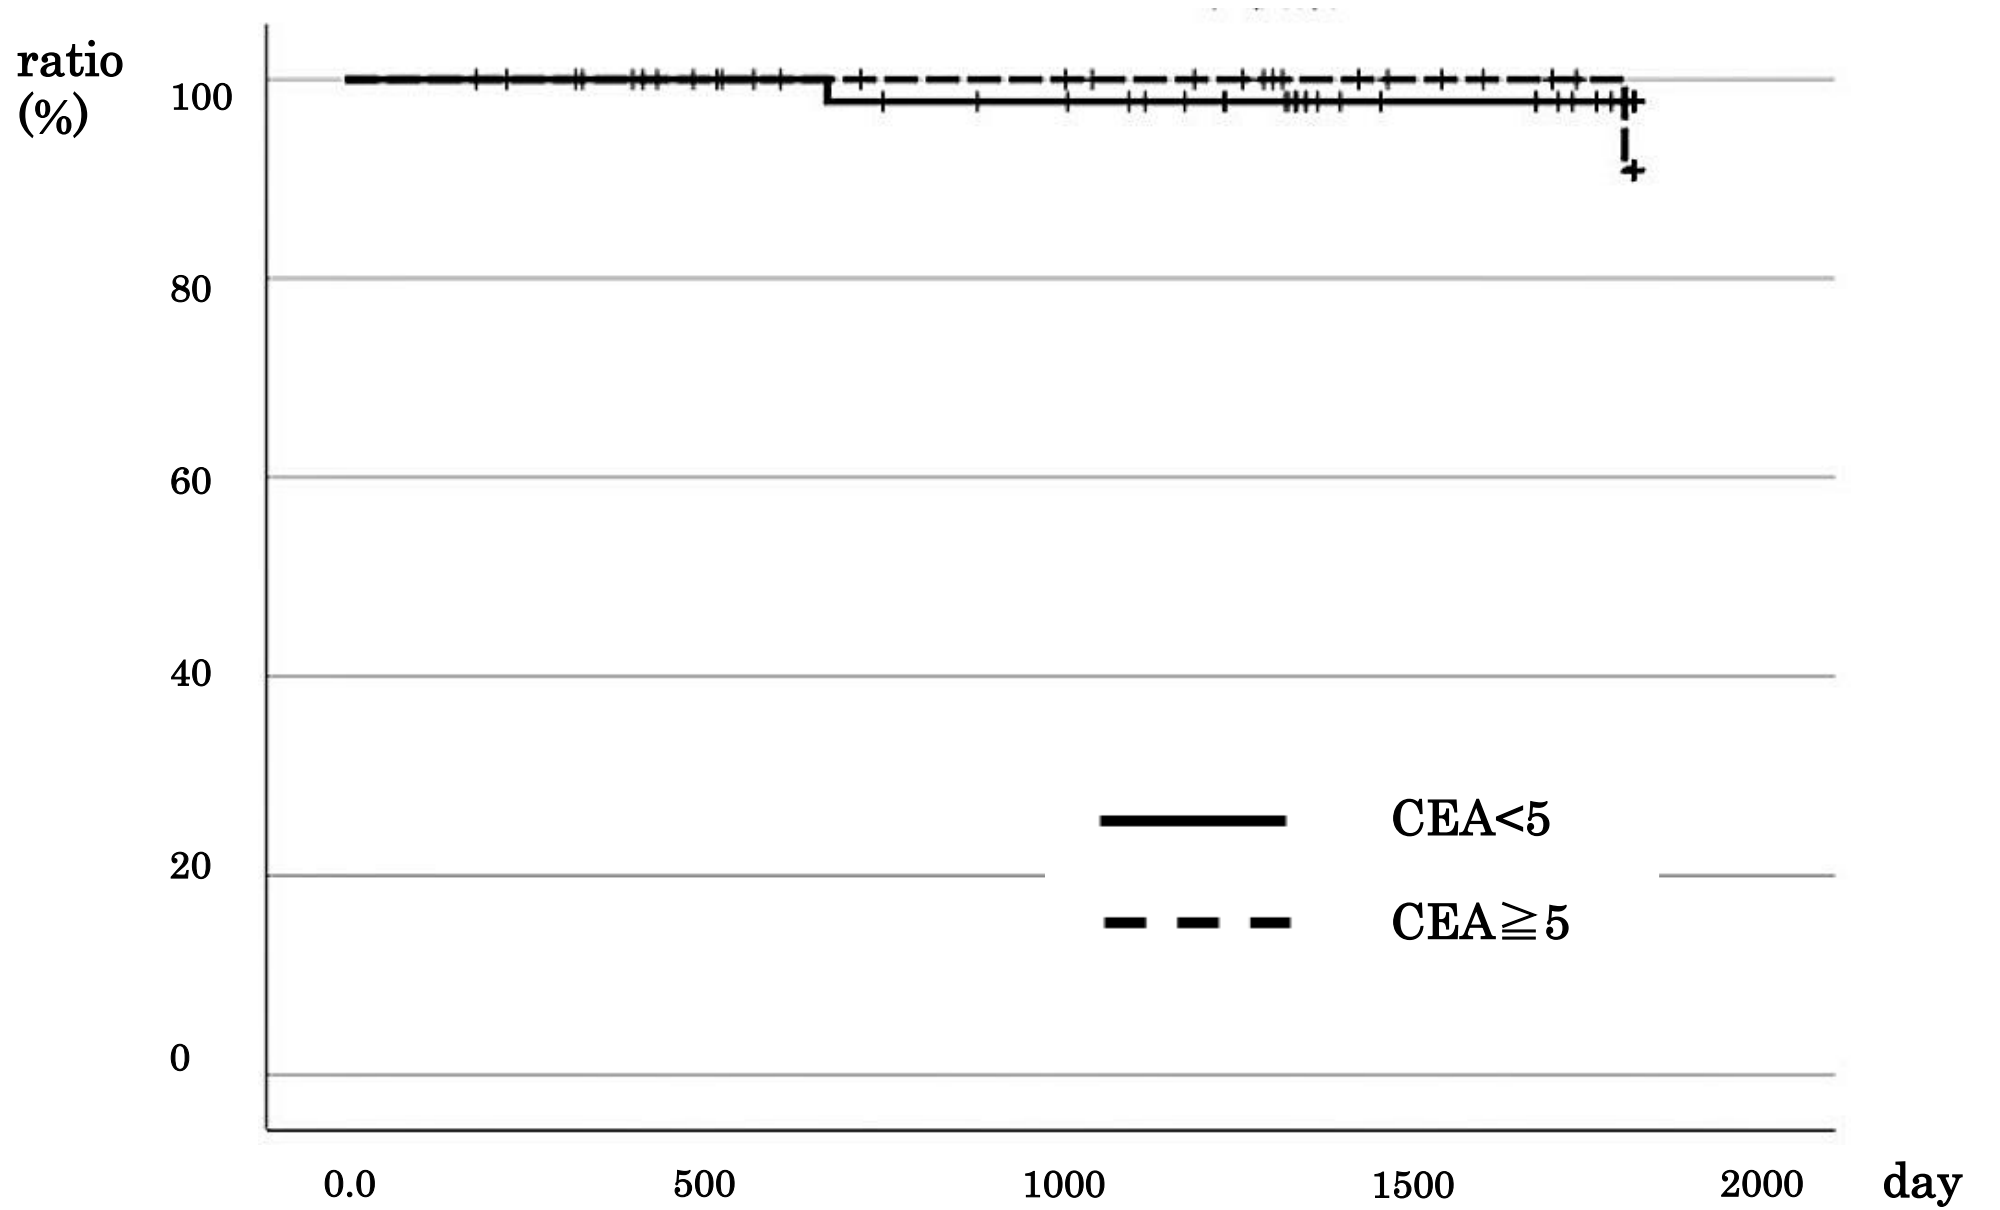

**Figure S2b.** Relationship between CEA values and survival rate in patients with stage II of colorectal cancer.

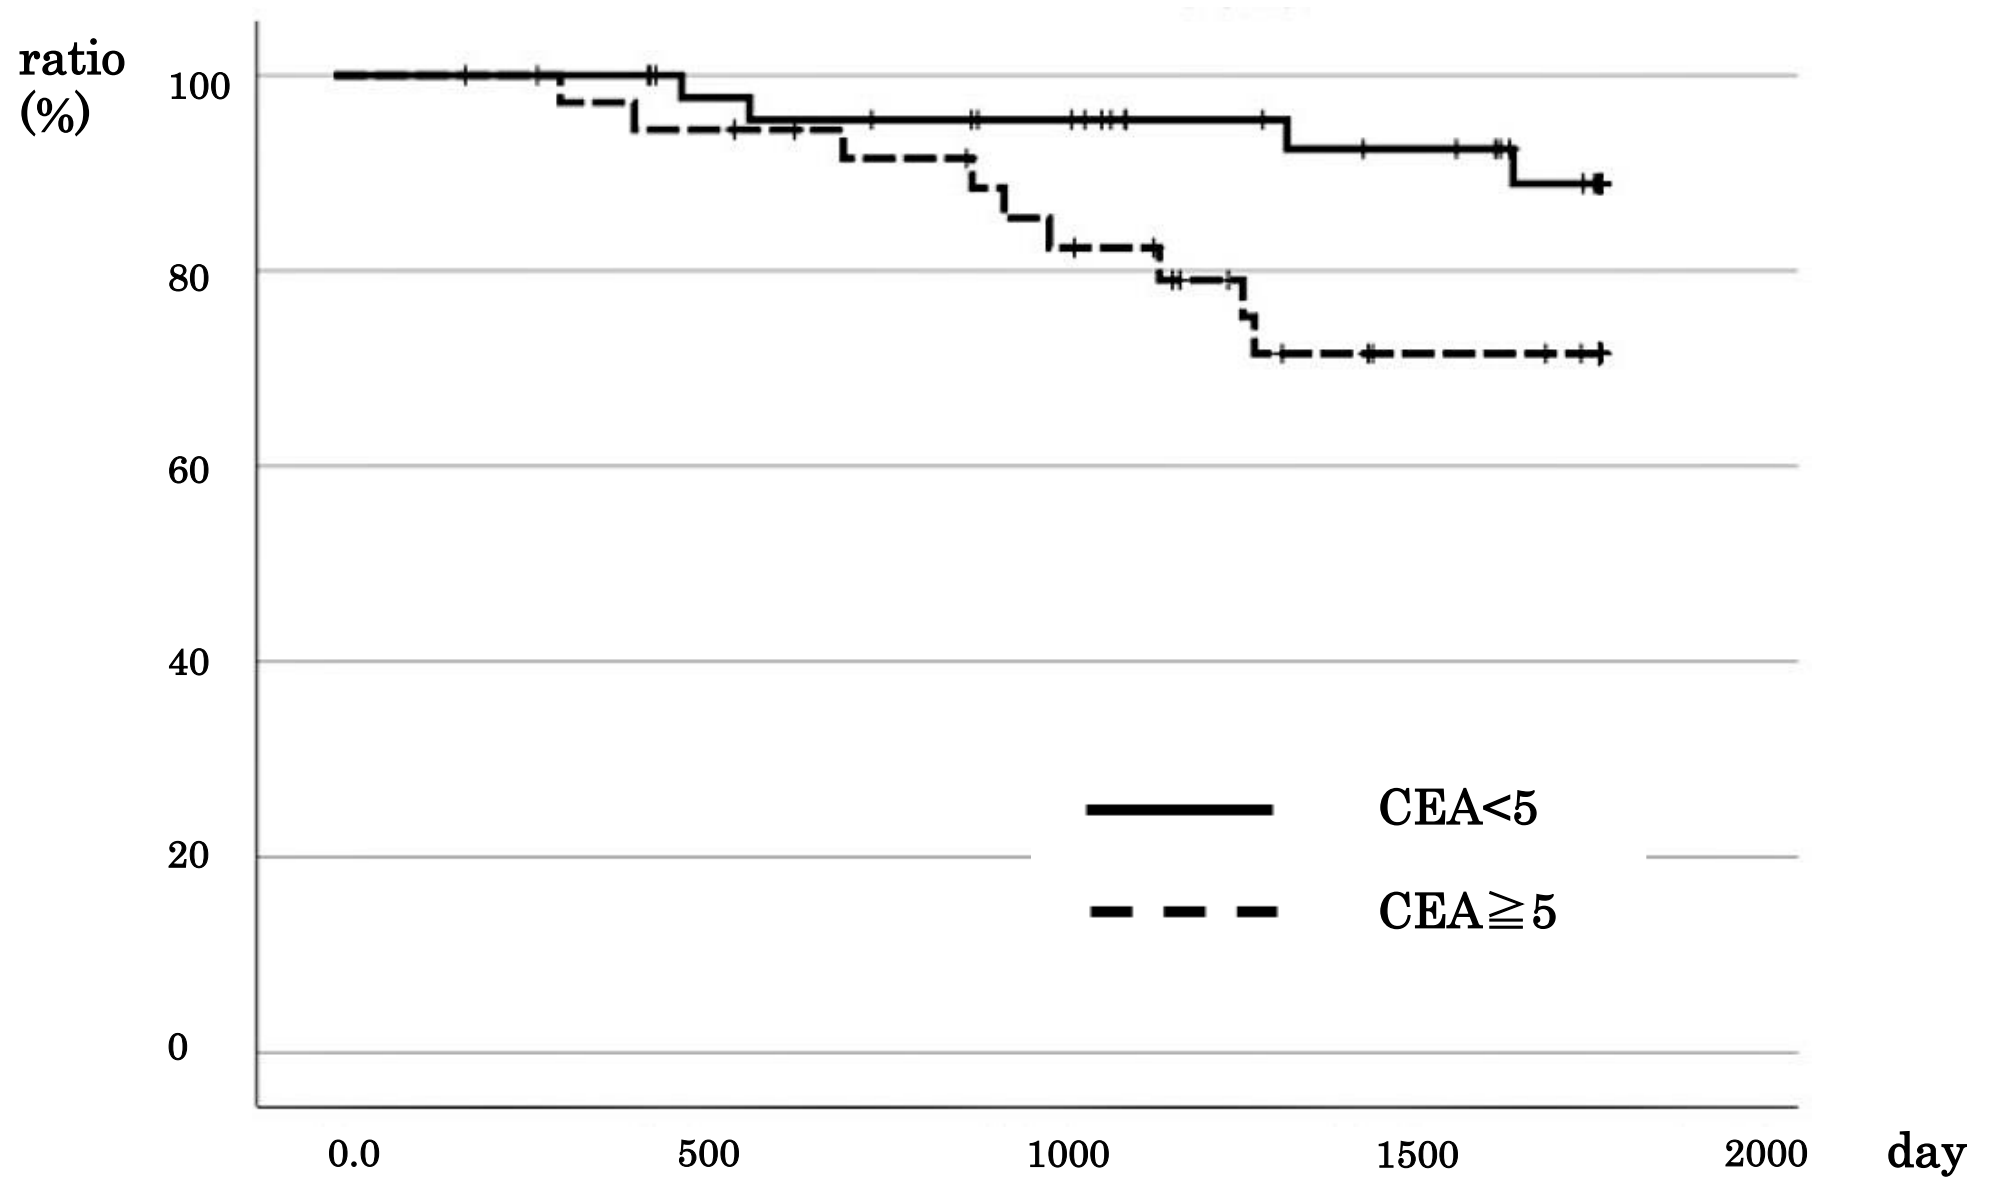

**Figure S2c.** Relationship between CEA values and survival rate in patients with stage III of colorectal cancer.

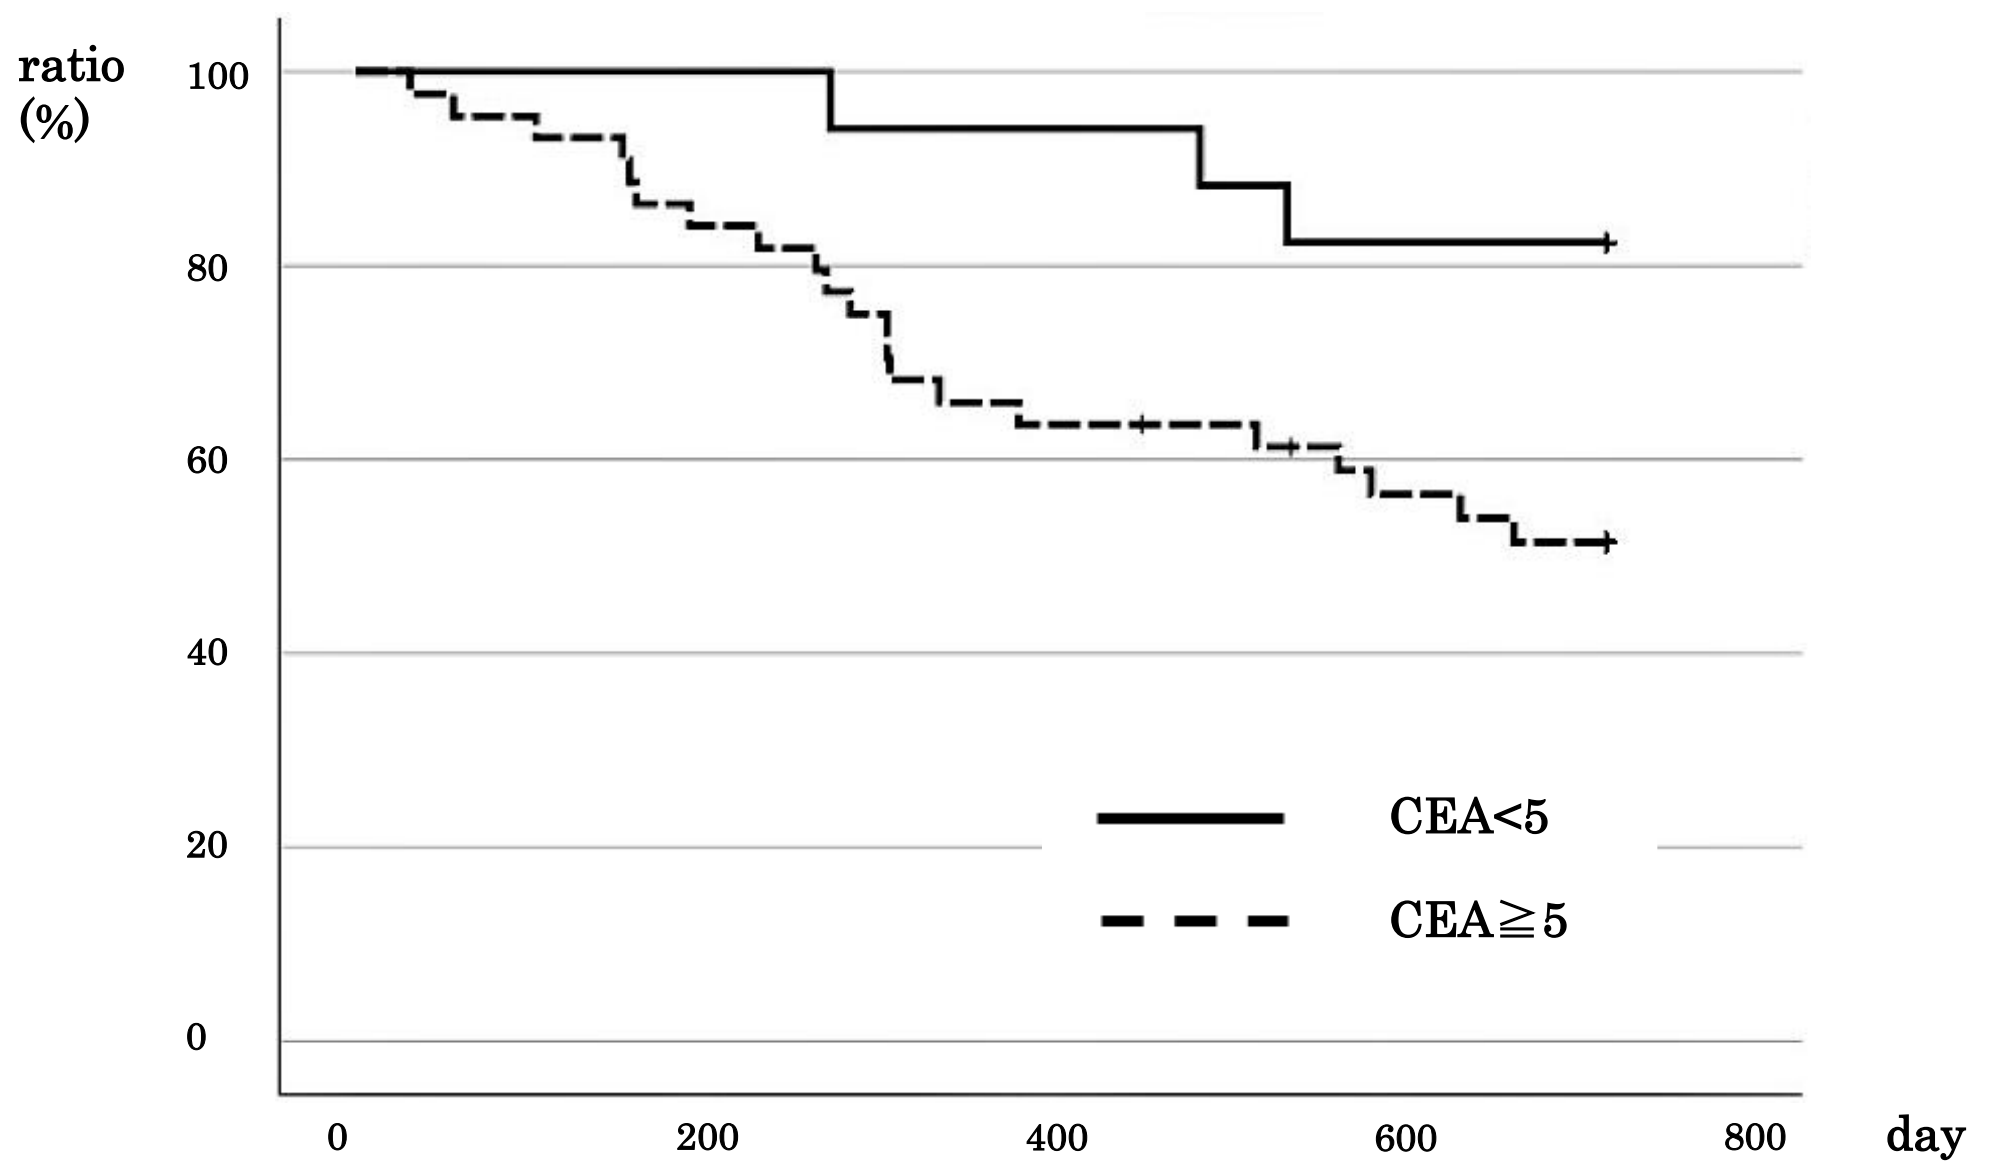

**Figure S2d.** Relationship between CEA values and survival rate in patients with stage IV of colorectal cancer.



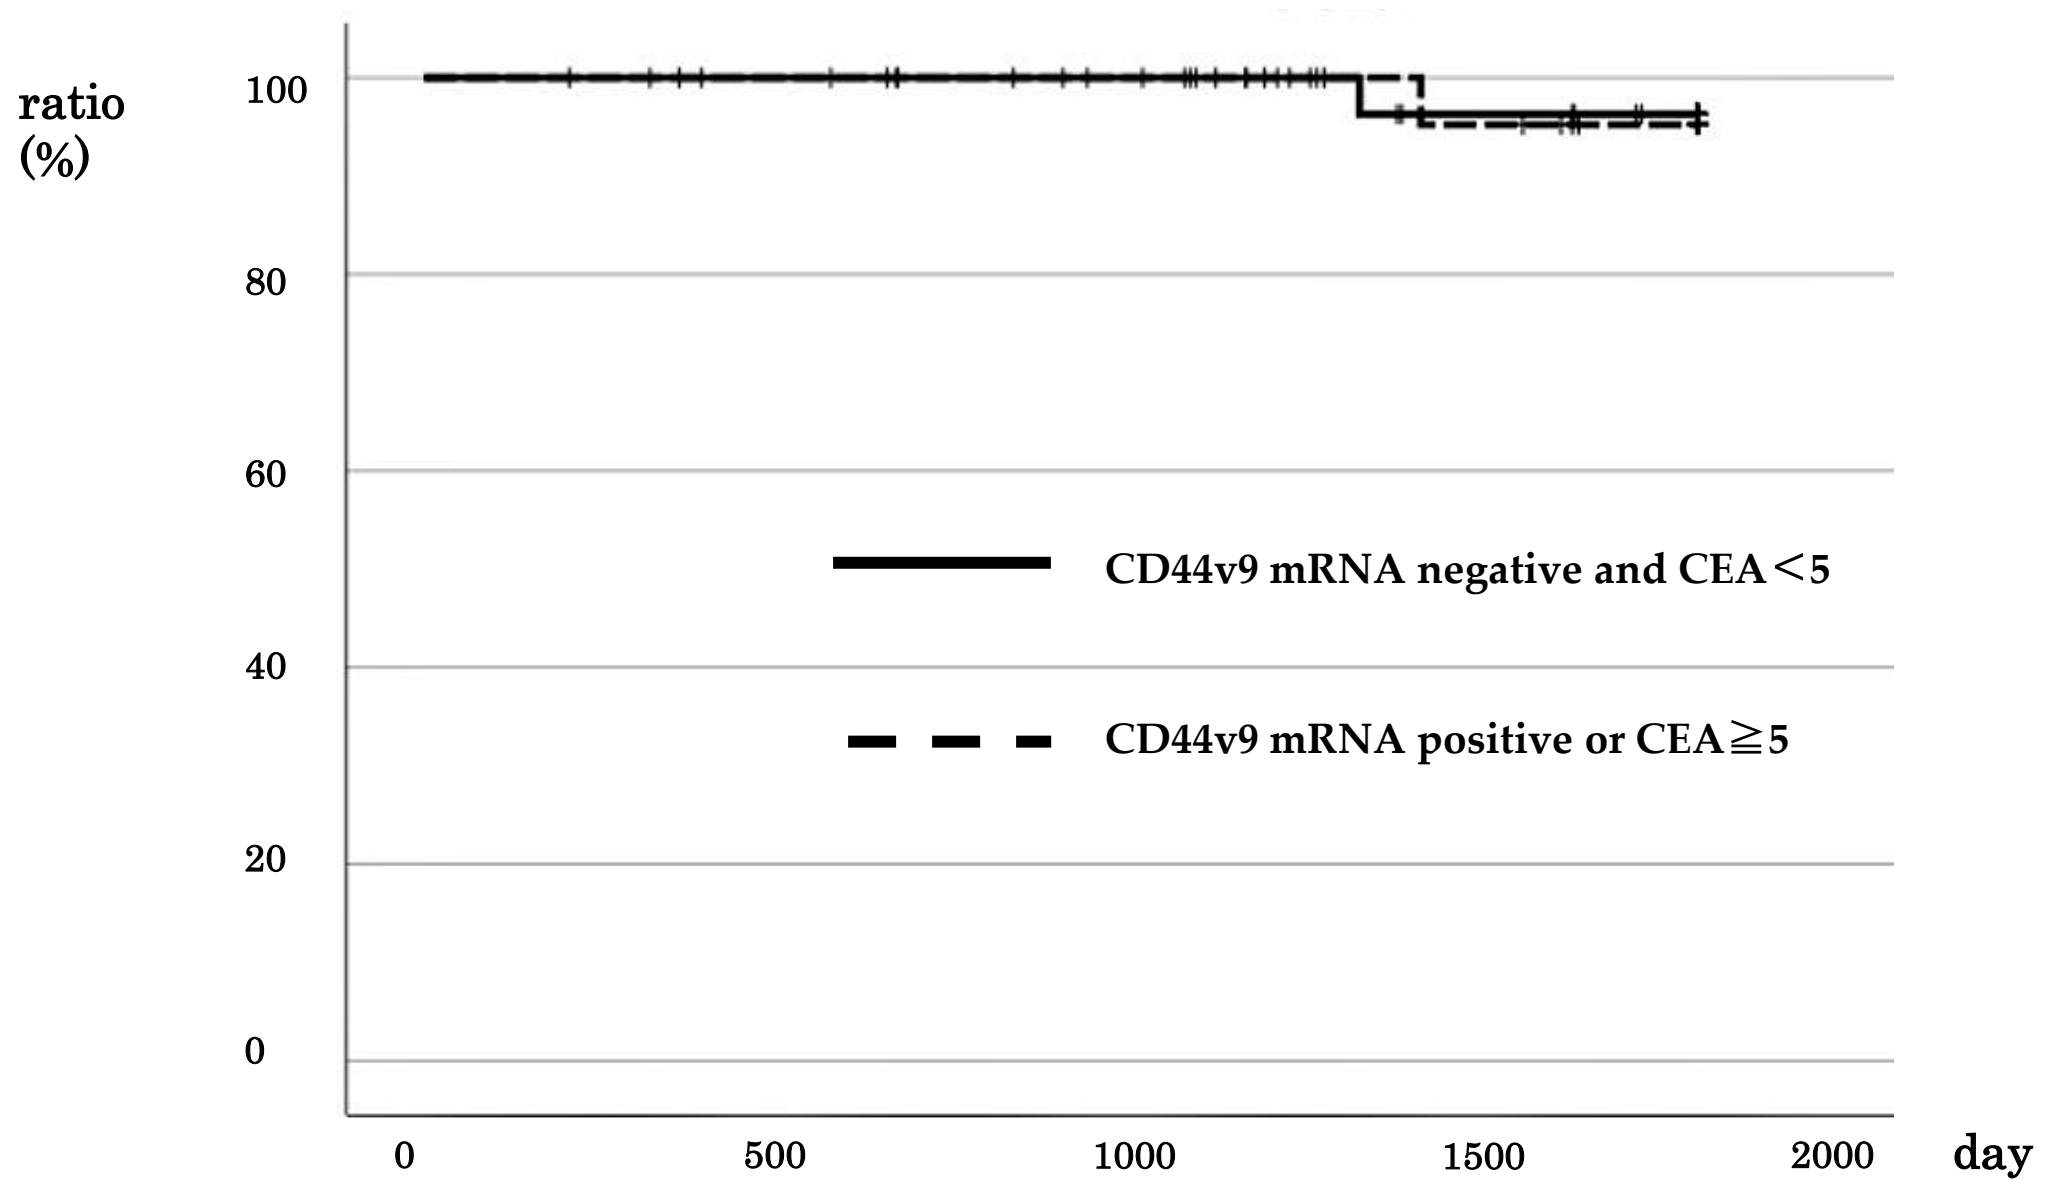

**Figure S3a.** Relationship between negative *CD44v9* mRNA expression and CEA < 5 and survival rate in patients with stage I of colorectal cancer.

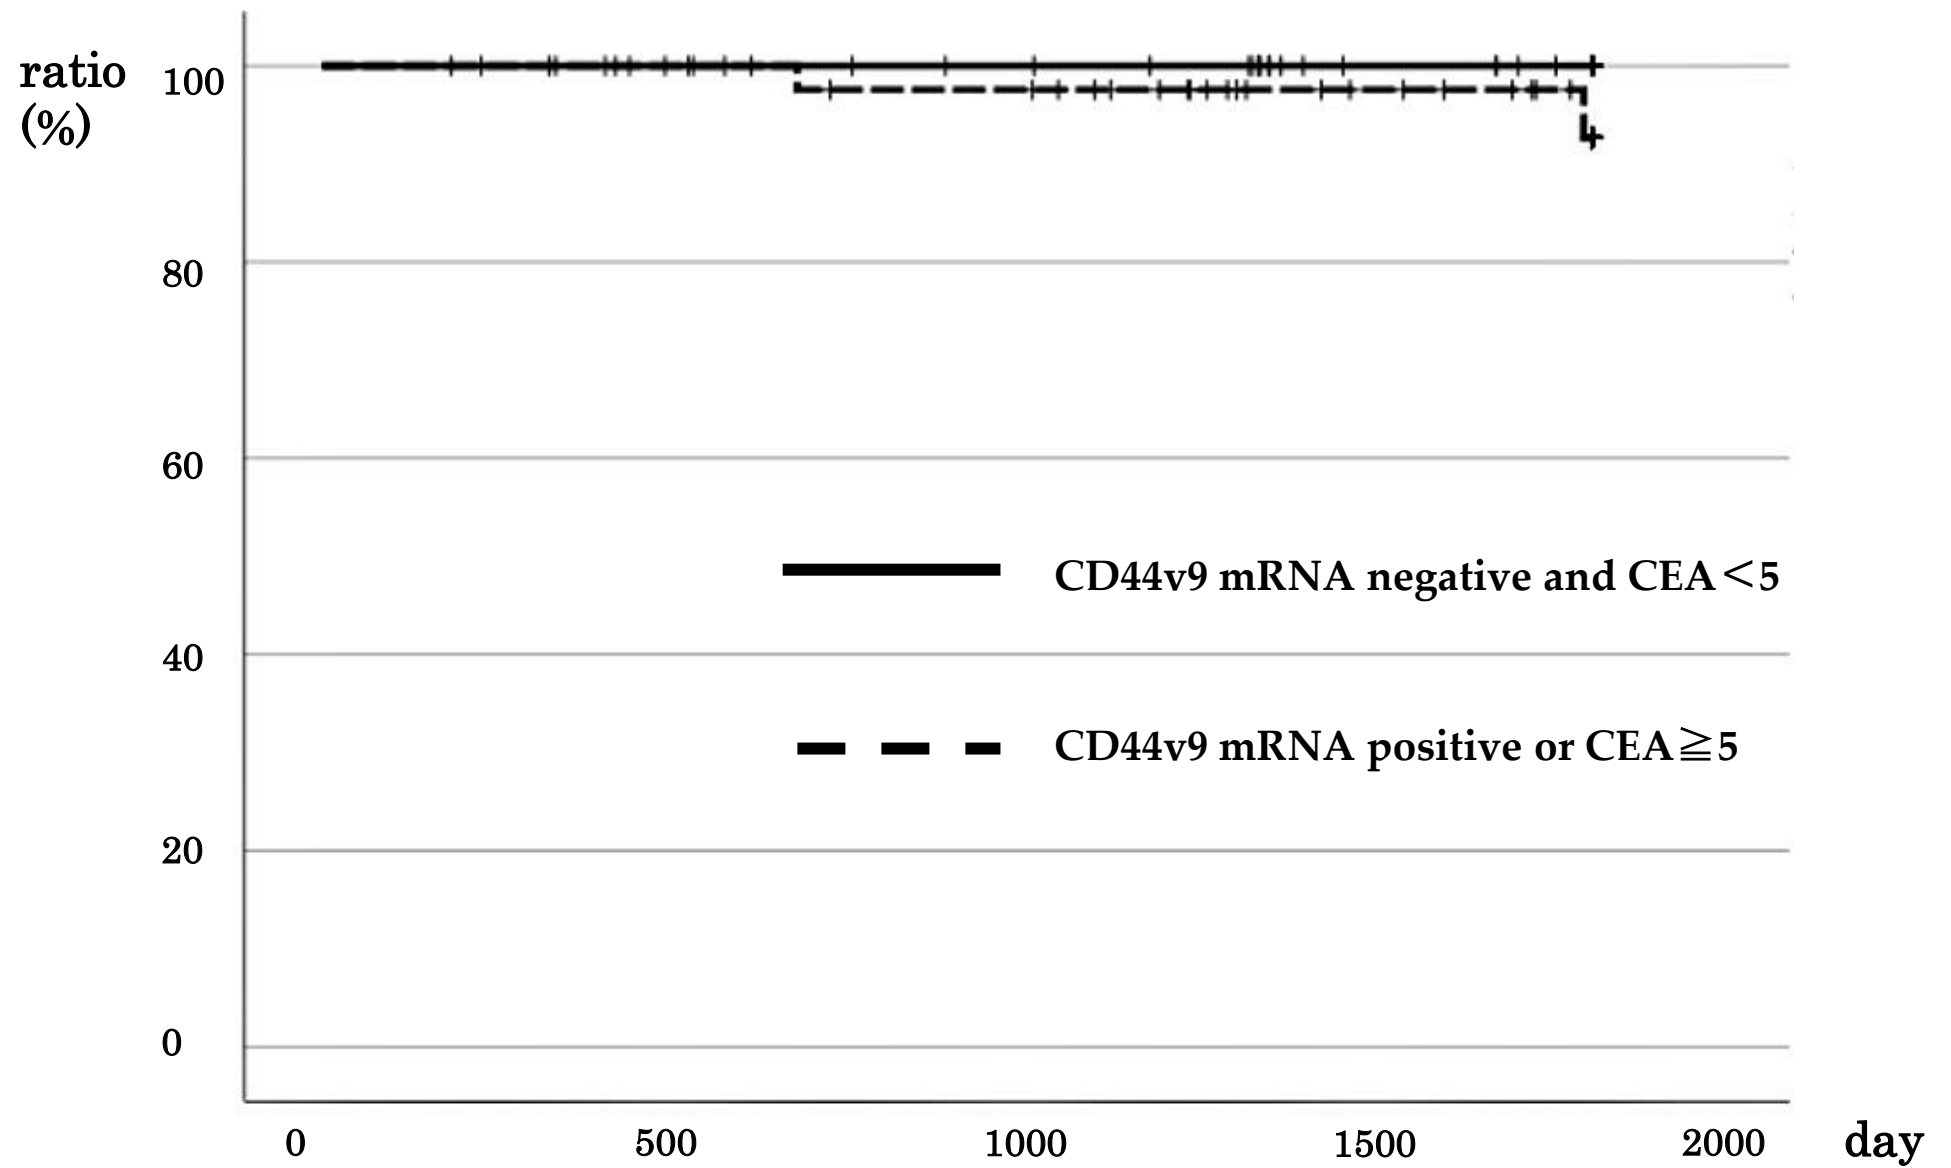

**Figure S3b.** Relationship between negative *CD44v9* mRNA expression and CEA < 5 and survival rate in patients with stage II of colorectal cancer.

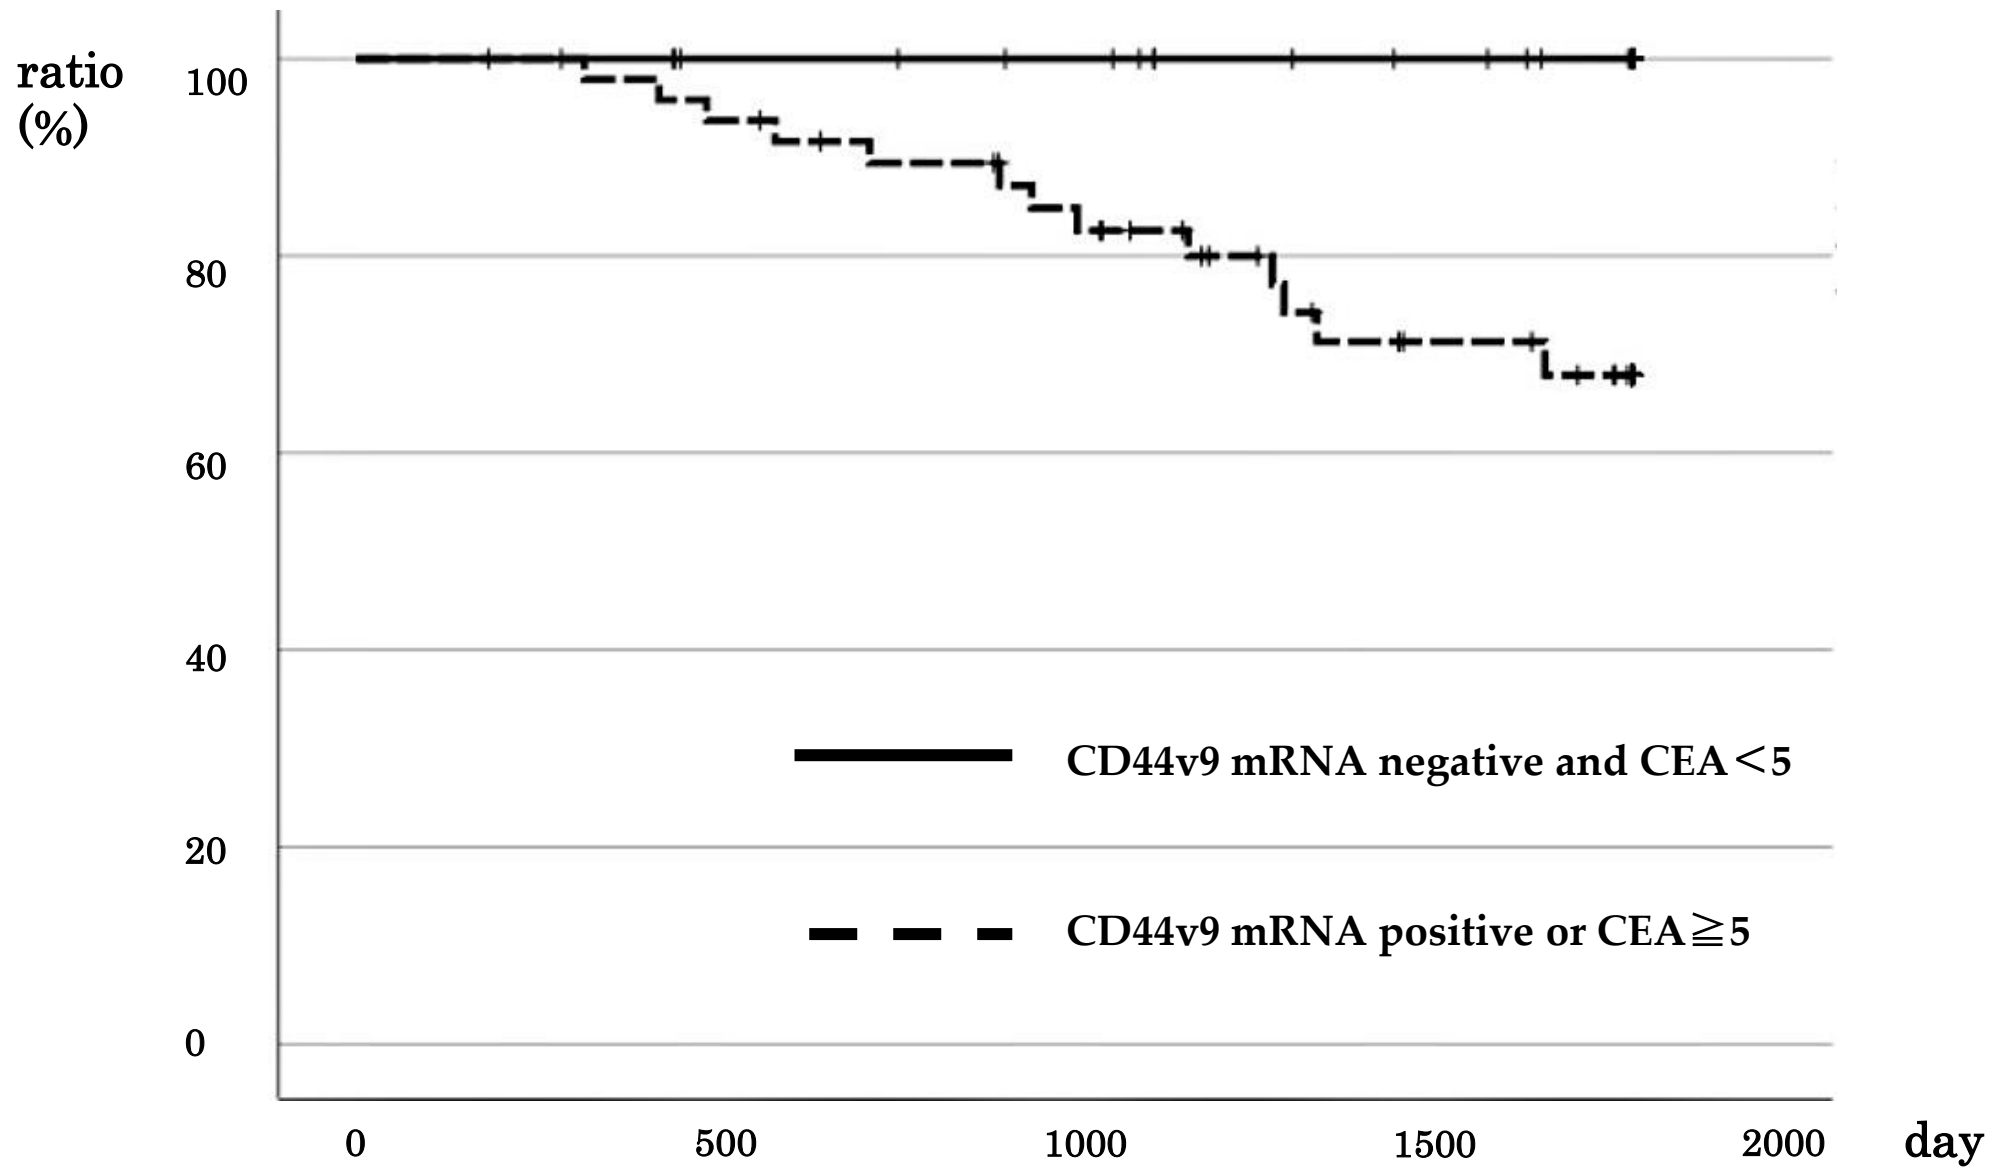

**Figure S3c.** Relationship between negative *CD44v9* mRNA expression and CEA < 5 and survival rate in patients with stage III of colorectal cancer.

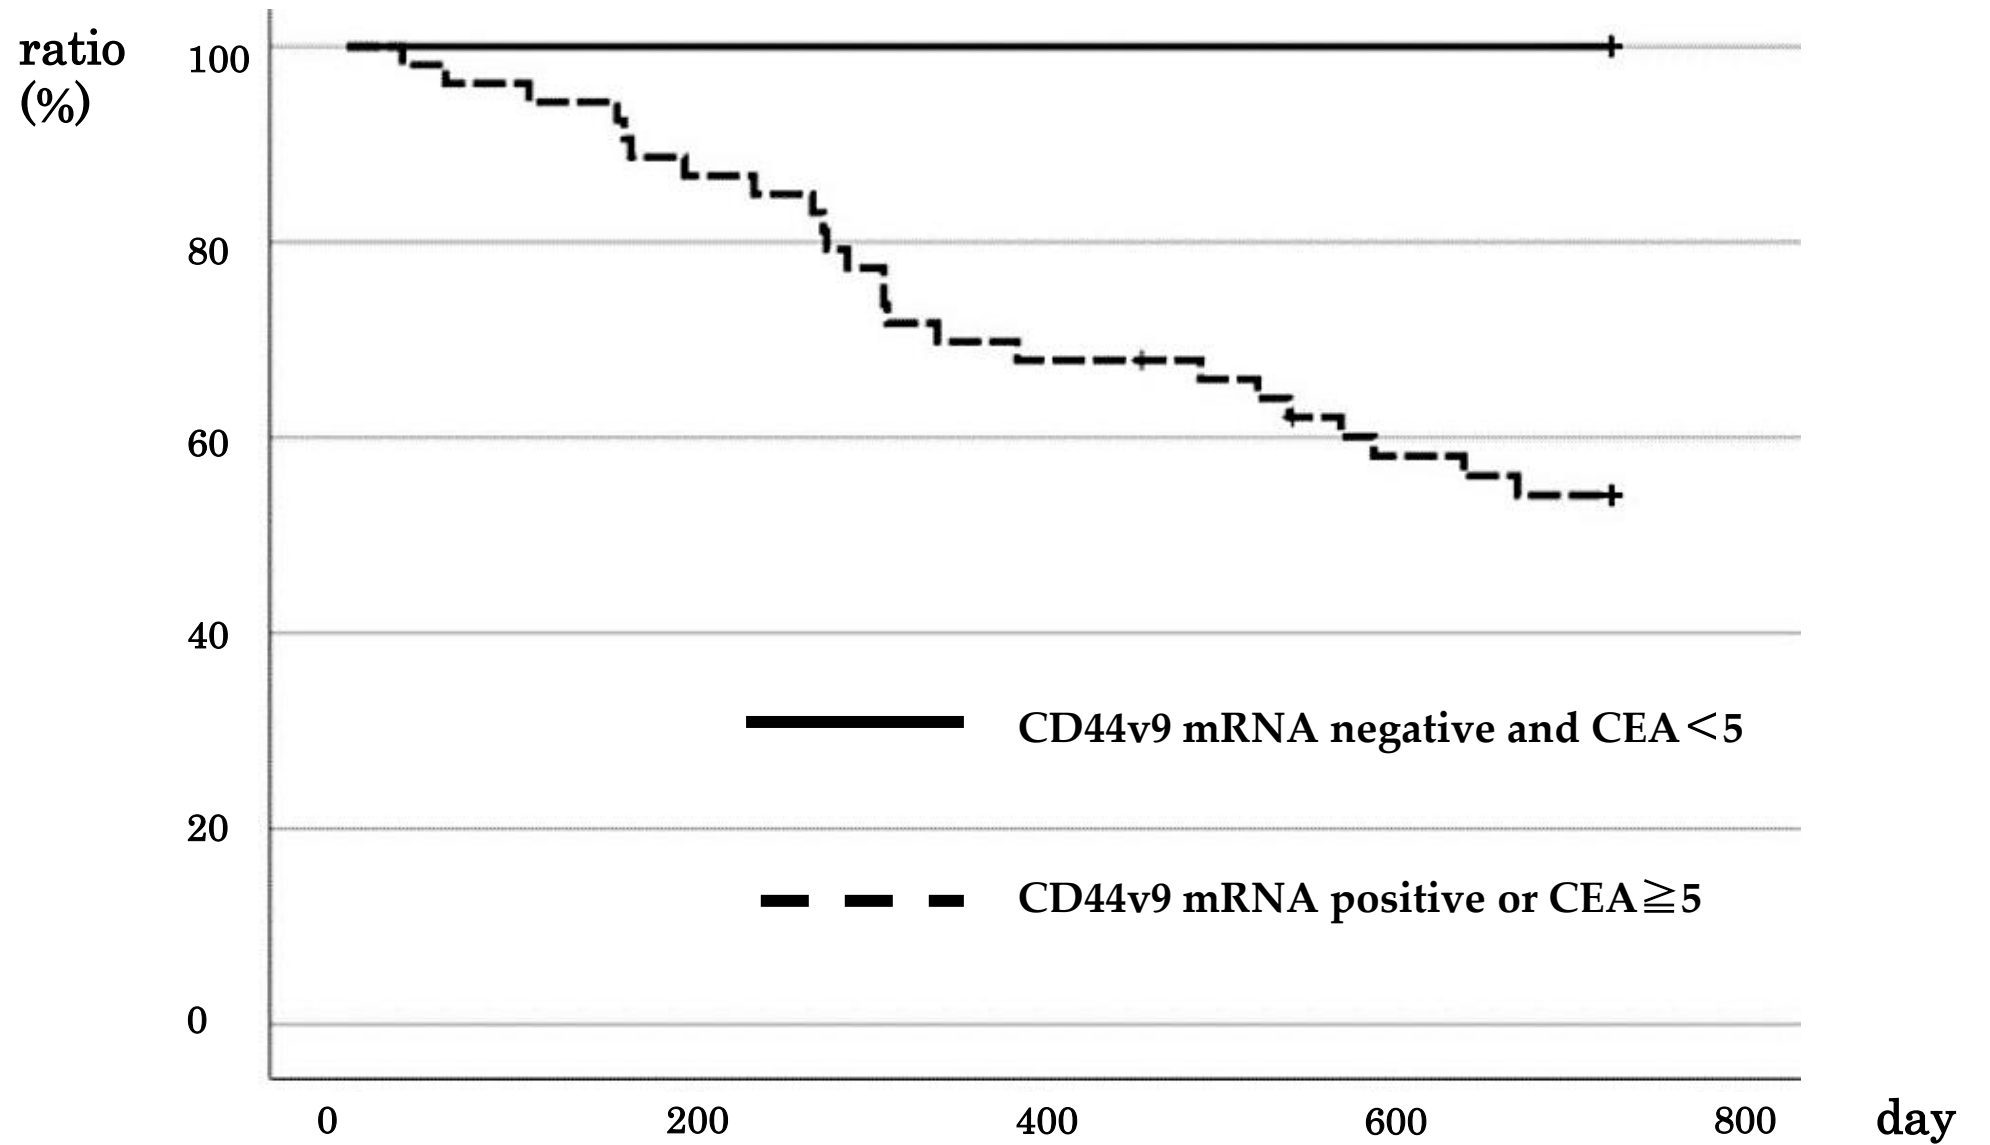

**Figure S3d.** Relationship between negative *CD44v9* mRNA expression and CEA < 5 and survival rate in patients with stage IV of colorectal cancer.

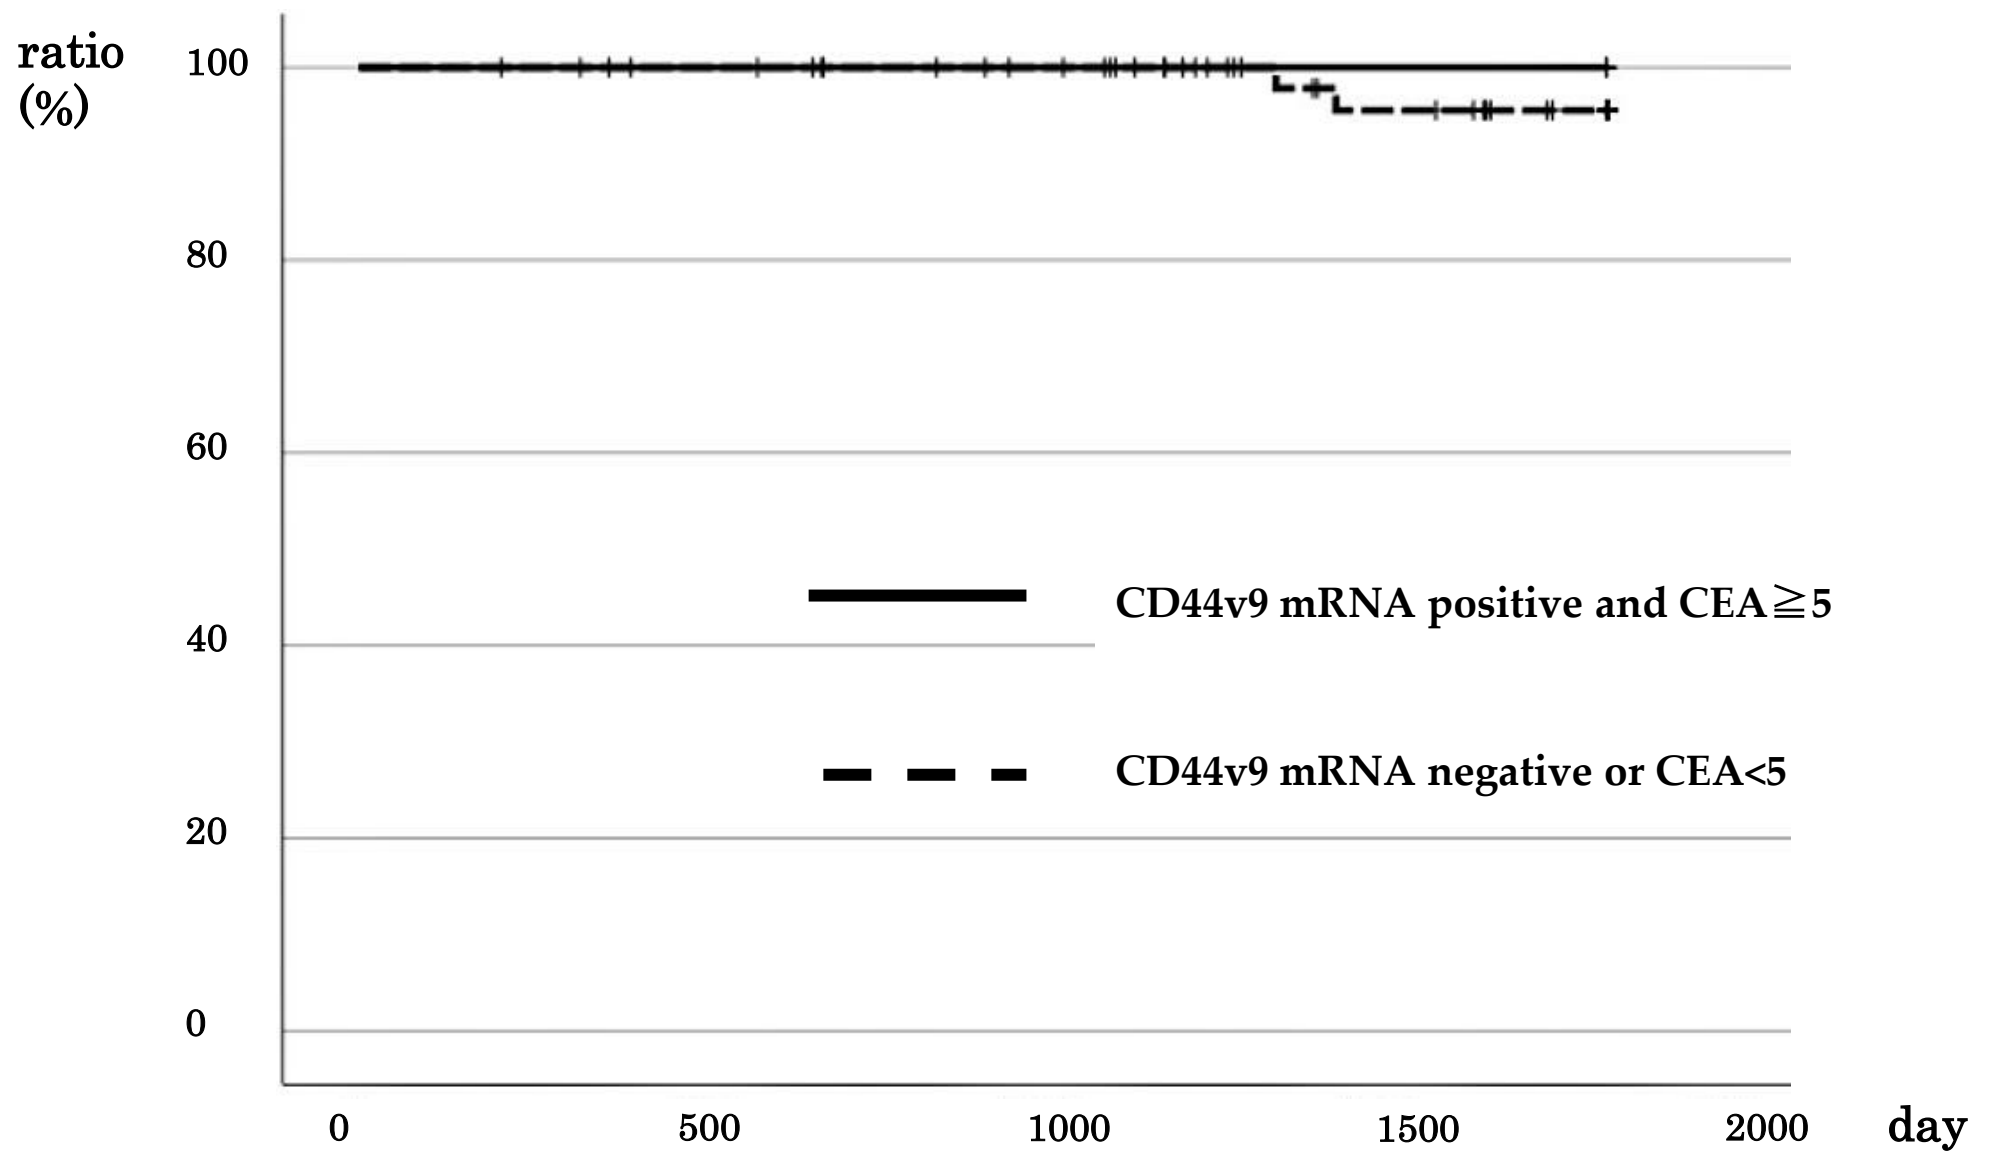

**Figure S4a.** Relationship between positive *CD44v9* mRNA expression and CEA  $\geq 5$  ng/mL and survival rate patients with stage I of colorectal cancer.

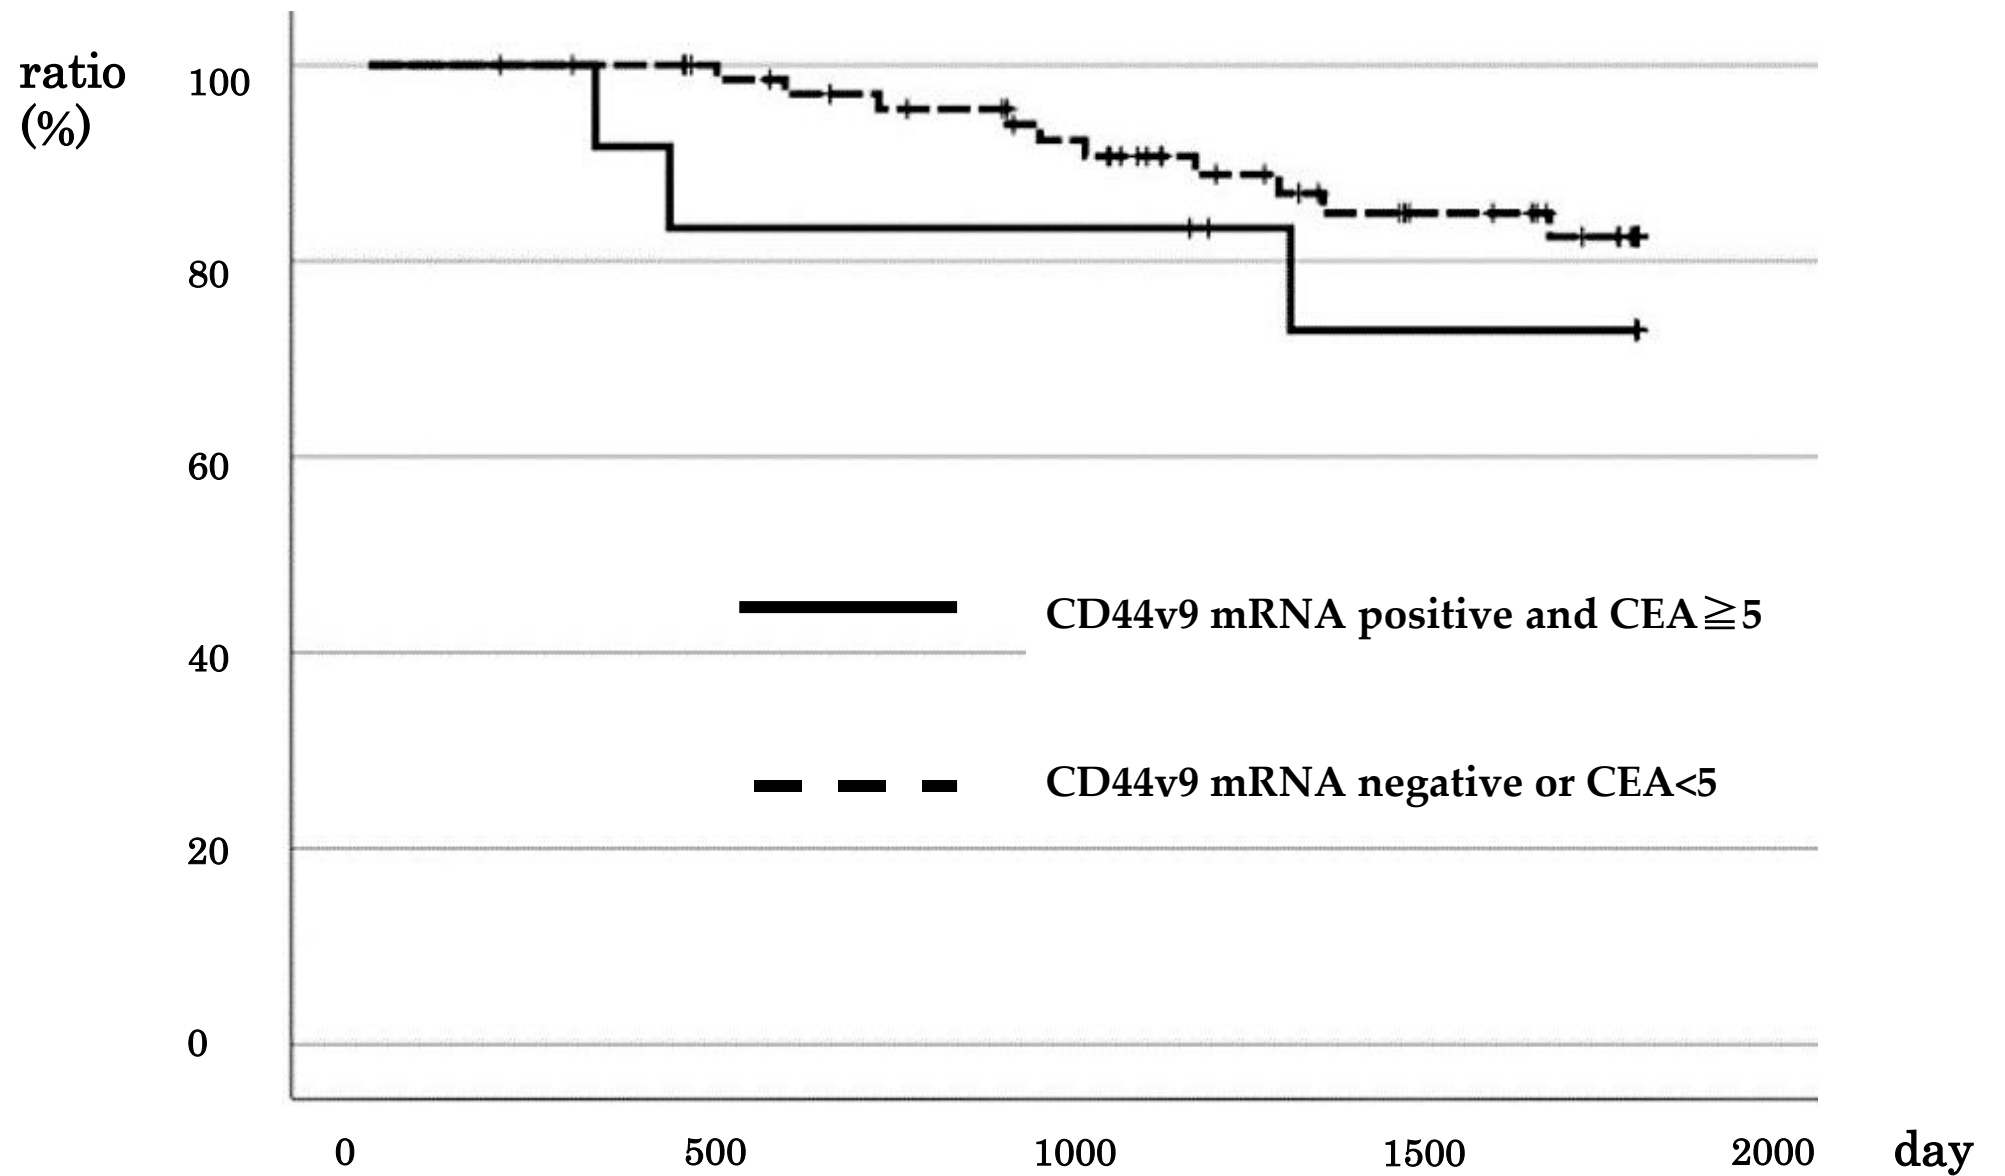

**Figure S4b.** Relationship between positive *CD44v9* mRNA expression and CEA  $\geq 5$  ng/mL and survival rate patients with stage III of colorectal cancer.

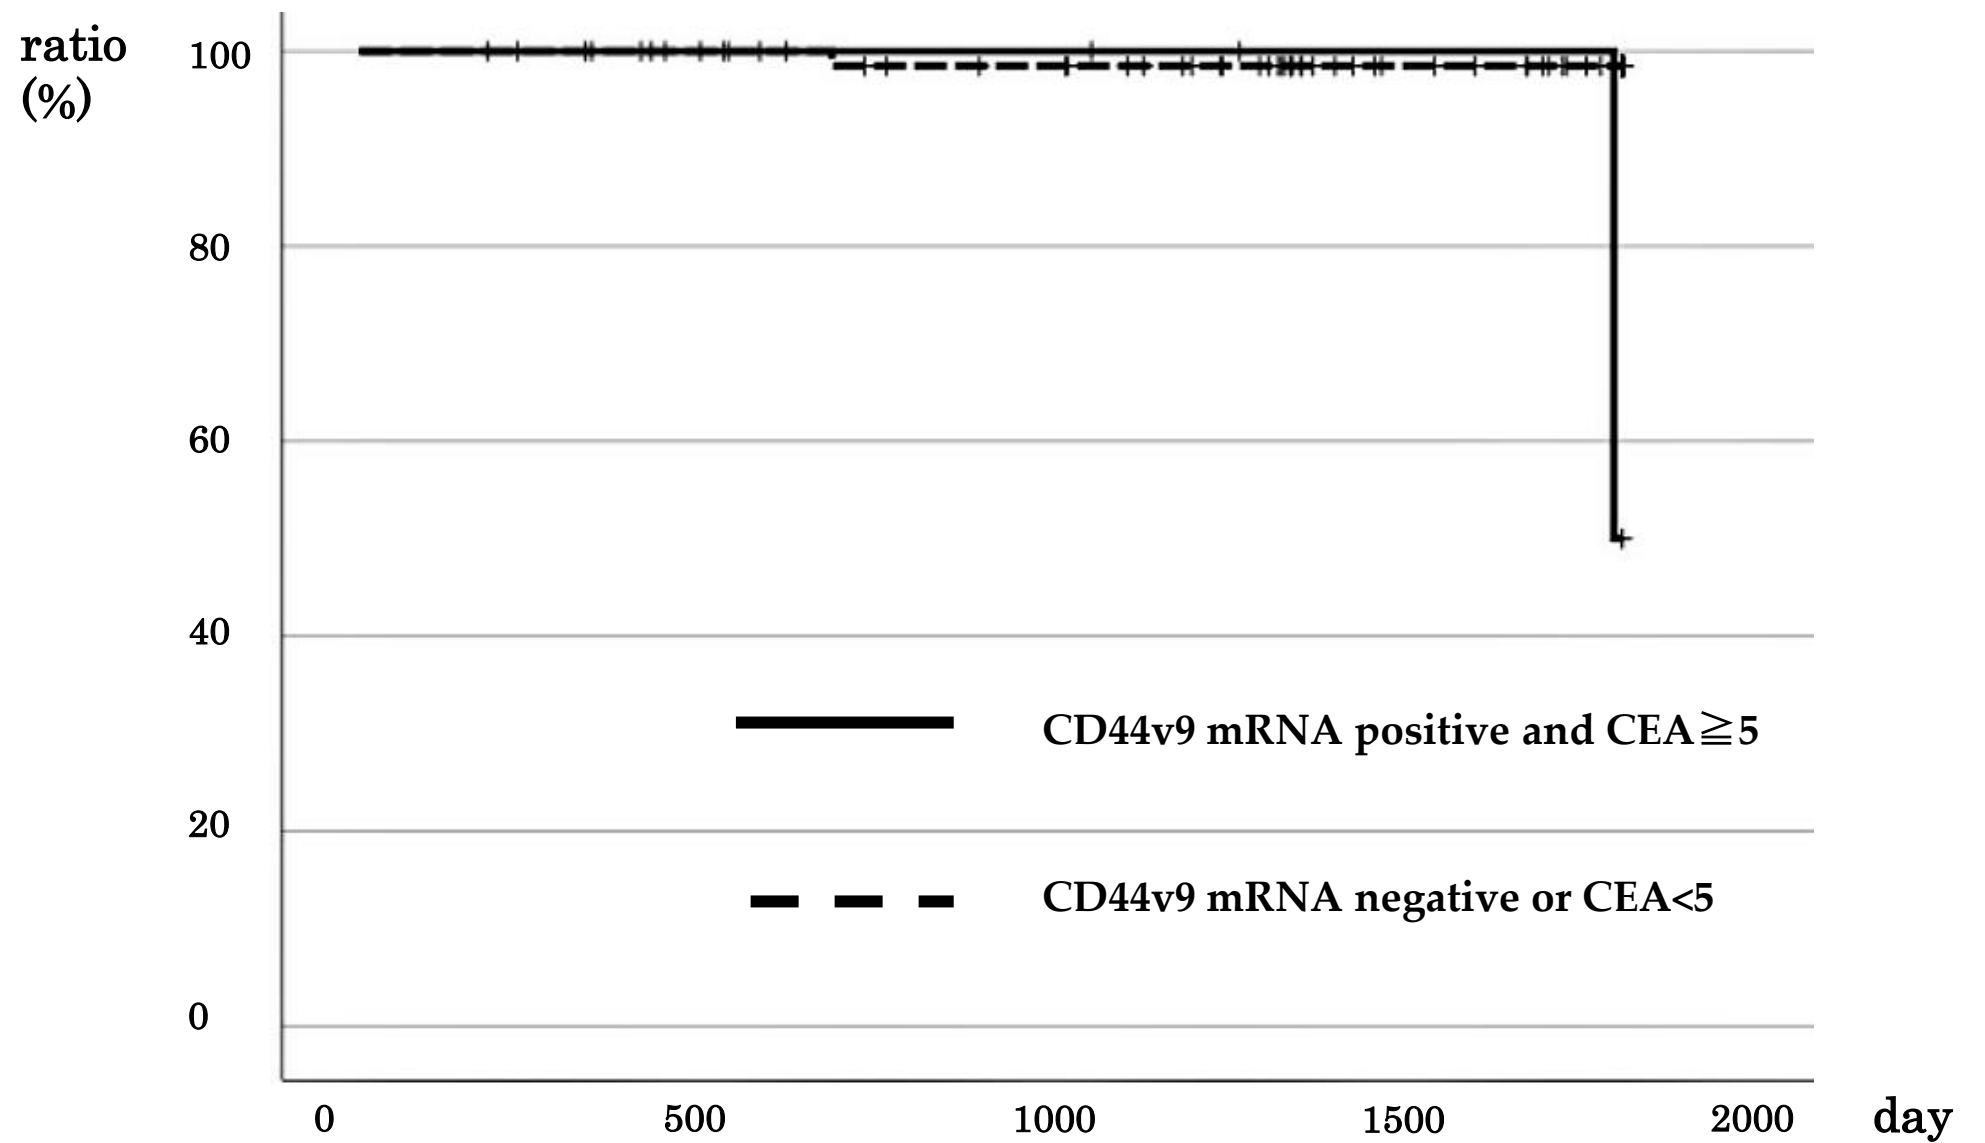

**Figure S4c.** Relationship between positive *CD44v9* mRNA expression and CEA  $\geq 5$  ng/mL and survival rate patients with stage II of colorectal cancer.

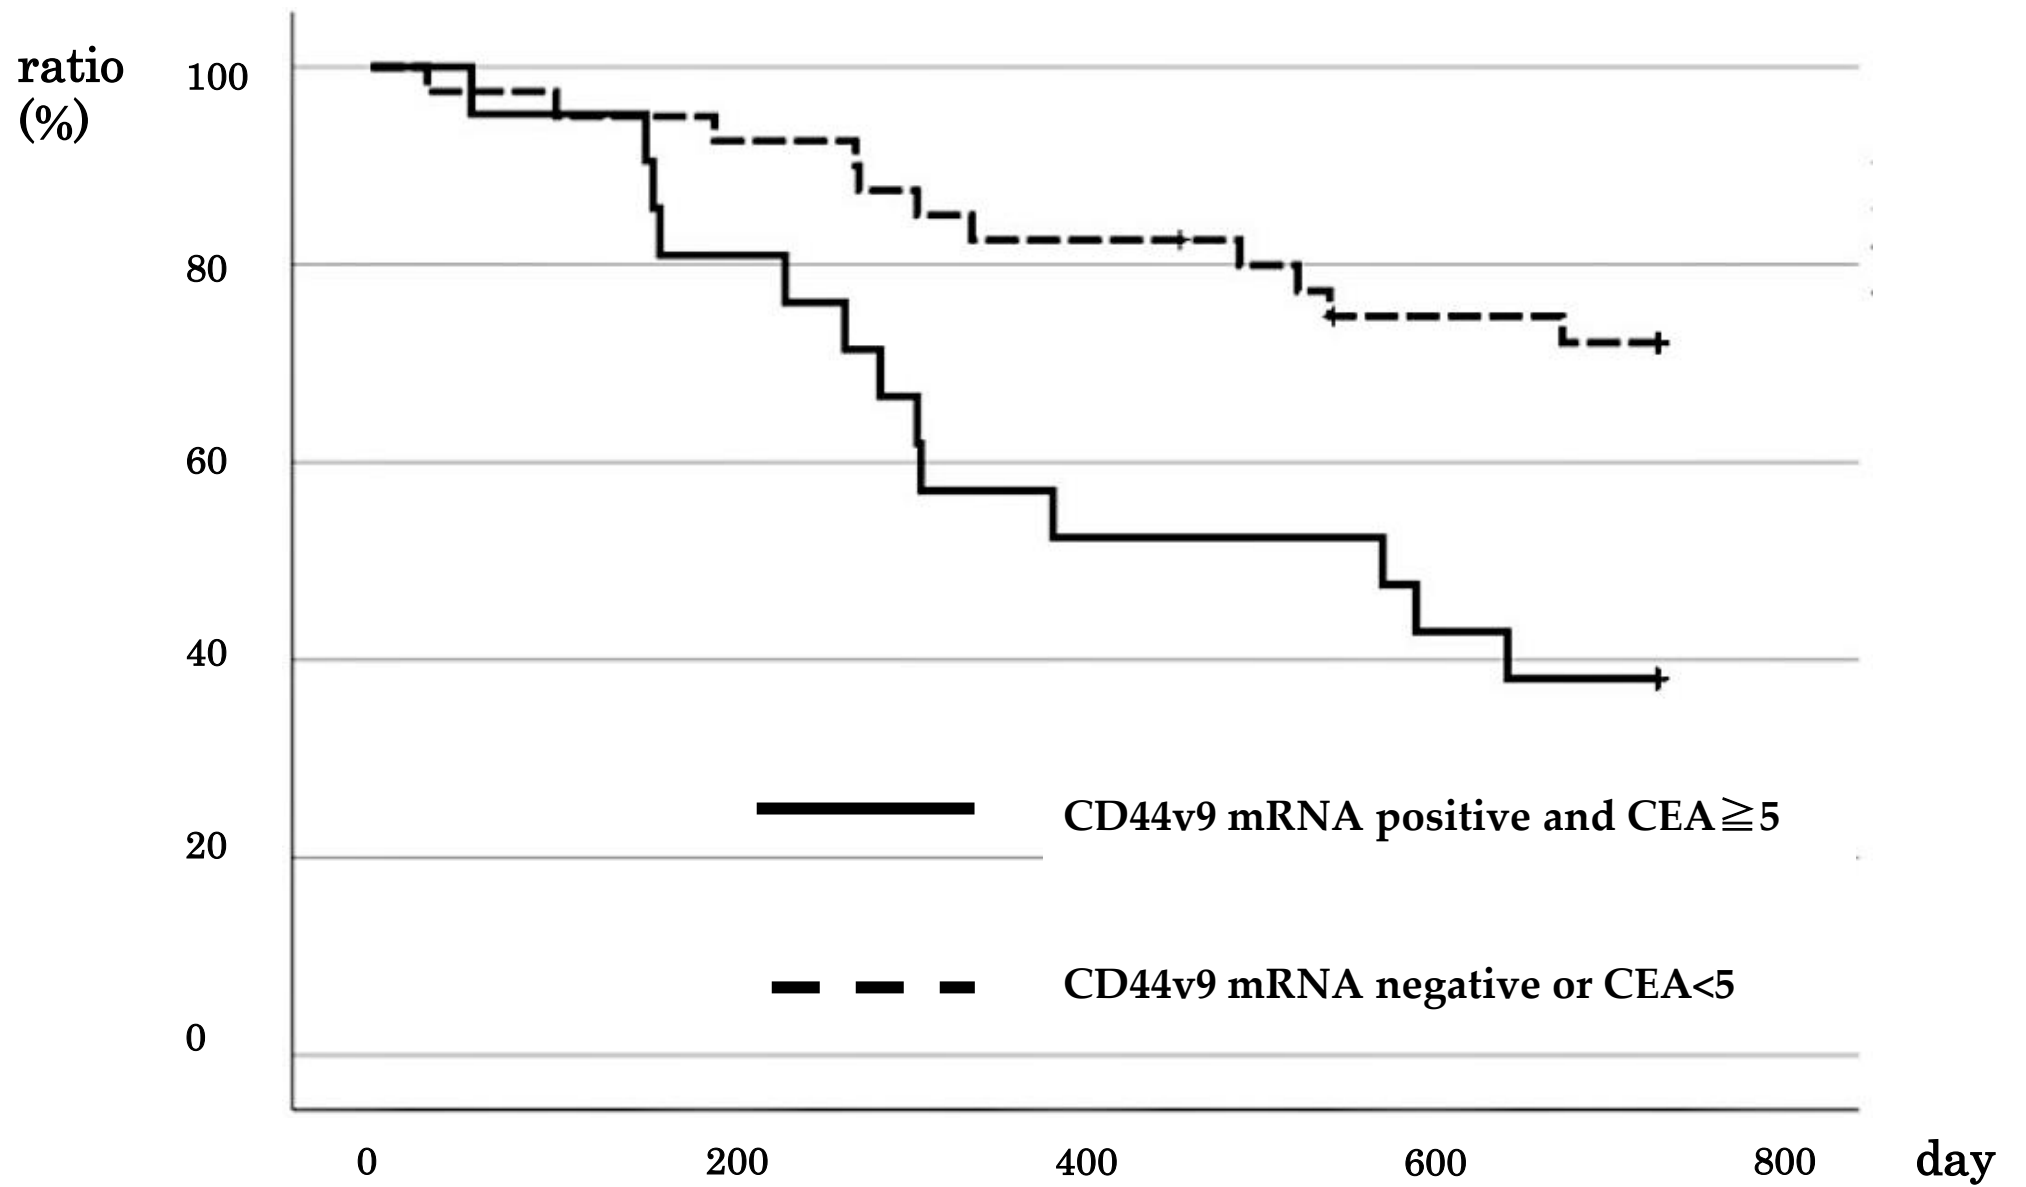

**Figure S4d.** Relationship between positive *CD44v9* mRNA expression and CEA  $\geq 5$  ng/mL and survival rate patients with stage IV of colorectal cancer.
